1 **Title**

2 Visual discrimination of optical material properties: a large-  
3 scale study

4

5

6 **Authors**

7 Masataka Sawayama<sup>1</sup>, Yoshinori Dobashi<sup>3,4</sup>, Makoto Okabe<sup>5</sup>, Kenchi Hosokawa<sup>6</sup>, Takuya  
8 Koumura<sup>1</sup>, Toni Saarela<sup>7</sup>, Maria Olkkonen<sup>8</sup>, & Shin'ya Nishida<sup>2,9</sup>

9

10 **Affiliations**

11 1. Inria

12 2. NTT Communication Science Laboratories, Nippon Telegraph and Telephone Corporation

13 3. Hokkaido University

14 4. Prometech CG Research

15 5. Shizuoka University

16 6. Ritsumeikan University

17 7. University of Helsinki

18 8. Durham University

19 9. Kyoto University

20

21

22 corresponding author: Masataka Sawayama (masa.sawayama@gmail.com)

23

24

25 **Abstract**

26       Complex visual processing involved in perceiving the object materials can be better elucidated  
27 by taking a variety of research approaches. Sharing stimulus and response data is an effective  
28 strategy to make the results of different studies directly comparable and can assist researchers with  
29 different backgrounds to jump into the field. Here, we constructed a database containing several sets  
30 of material images annotated with visual discrimination performance. We created the material  
31 images using physically-based computer graphics techniques and conducted psychophysical  
32 experiments with them in both laboratory and crowdsourcing settings. The observer's task was to  
33 discriminate materials on one of six dimensions (gloss contrast, gloss distinctness-of-image,  
34 translucent vs. opaque, metal vs. plastic, metal vs. glass, and glossy vs. painted). The illumination  
35 consistency and object geometry were also varied. We used a non-verbal procedure (an oddity task)  
36 applicable for diverse use-cases such as cross-cultural, cross-species, clinical, or developmental  
37 studies. Results showed that the material discrimination depended on the illuminations and  
38 geometries and that the ability to discriminate the spatial consistency of specular highlights in  
39 glossiness perception showed larger individual differences than in other tasks. In addition, analysis  
40 of visual features showed that the parameters of higher-order color texture statistics can partially,  
41 but not completely, explain task performance. The results obtained through crowdsourcing were  
42 highly correlated with those obtained in the laboratory, suggesting that our database can be used  
43 even when the experimental conditions are not strictly controlled in the laboratory. Several projects  
44 using our dataset are underway.

45

46

47

## 48 Introduction

49 Humans can visually recognize a variety of material properties of the objects they daily  
50 encounter. Although material properties, such as glossiness and wetness, substantially contribute to  
51 recognition, the contributions of value-based decision making, motor control, and computational  
52 and neural mechanisms underlying material perception had been overlooked until relatively  
53 recently—for a long time vision science mainly used simple artificial stimuli to elucidate the  
54 underlying brain mechanisms. In the last two decades, however, along with the advancement in  
55 computer graphics and machine vision, material perception becomes one of major topics in vision  
56 science (Adelson, 2001; Fleming, 2017; Nishida, 2019).

57 Visual material perception can be considered to be an estimation of material-related properties  
58 from an object image. For example, gloss/matte perception entails a visual computation of the  
59 diffuse and specular reflections of the surface. However, psychophysical studies have shown that  
60 human gloss perception does not have robust constancy against changes in surface geometry and  
61 illumination (e.g., Nishida & Shinya, 1998; Fleming et al. 2003), the other two main factors of image  
62 formation. Such estimation errors have provided useful information as to what kind of image cues  
63 humans use to estimate gloss. A significant number of psychophysical studies have been carried out  
64 not only on gloss, but also on other optical material properties (e.g., transparency, transparency and  
65 wetness) (Fleming et al., 2005; Motoyoshi, 2010; Xiao et al., 2014; Sawayama, Adelson, & Nishida,  
66 2017) and mechanical material properties (e.g., viscosity, elasticity) (Kawabe et al., 2015; Paulun et  
67 al., 2017; van Assen, Barla & Fleming, 2018). Neurophysiological and neuroimaging studies have  
68 revealed various neural mechanisms underlying material perception (Kentridge et al., 2012; Nishio  
69 et al., 2012, 2014; Miyakawa et al., 2017). Some recent studies have also focused on developmental,  
70 environmental, and clinical factors of material processing (Yang et al., 2015; Goda et al., 2016;  
71 Ohishi et al. 2018). For instance, Goda et al. (2016) showed in their monkey fMRI study that the  
72 visuo-haptic experience of material objects alters the visual cortical representation. In addition, large  
73 individual differences in the perception of colors and materials depicted in one photo (#TheDress)  
74 has attracted a broad range of interest and has provoked intensive discussions (Brainard & Hurlbert,  
75 2015; Gegenfurtner et al., 2015).

76 A promising strategy for a more global understanding of material perception is to promote  
77 multidisciplinary studies comparing behavioral/physiological responses of humans and animals  
78 obtained under a variety of developmental, environmental, cultural, and clinical conditions. There  
79 are two problems however. One lies in the high degree of freedom in selecting experimental stimulus  
80 parameters and task procedures. Since the appearance of a material depends not only on reflectance  
81 parameters, but also on geometry and illumination, all of which are high dimensional, use of  
82 different stimuli (and different tasks) in different studies could impose serious limitations on direct  
83 data comparisons. The other problem is the technical expertise necessary for rendering realistic  
84 images, which could discourage researchers unfamiliar with graphics from starting material  
85 perception studies.

86       Aiming at removing these obstacles, we attempted to build a database that can be shared among  
87 multidisciplinary material studies. We rendered several sets of material images. The images in each  
88 set were changed in one of material dimensions in addition to illumination and viewing conditions.  
89 We then measured the behavioural performance for those image sets using a large number of  
90 “standard” observers. We used a simple task that can be used in a variety of human, animal and  
91 computational studies. By using our database, one would be able to efficiently start a new study,  
92 shortening time for stimulus preparation, as well as time for control data collection with standard  
93 human observers.

94       Specifically, we selected six dimensions of material property (Fig. 1). These dimensions have  
95 been extensively studied in the past material perception studies. Most of them can be unambiguously  
96 manipulated by changing the corresponding rendering parameters. Although we attempted to cover  
97 a wide range of optical material topics, we never believe this an exclusive list of critical material  
98 properties vision science should challenge. Our intention is not to build the standard database for all  
99 material recognition research, but to make one primitive test set that promotes further examination  
100 of the previous findings on material recognition in more diverse research contexts. (see Discussion).

101       Three of these dimensions are related to gloss (Fig. 1, Task 1: GC, Task 2: GD, and Task 6:  
102 GP), the most widely investigated material attribute (Pellacini et al., 2000; Fleming et al., 2003;  
103 Motoyoshi et al., 2007; Olkkonen & Brainard, 2010; Doerschner et al., 2011; Kim et al., 2011;  
104 Marlow et al., 2011; 2012; Kentridge et al., 2012; Sun et al., 2015; Nishio et al., 2014; Adams et al.,  
105 2016; Miyakawa et al., 2017). We controlled the contrast gloss and distinctness-of-image (DOI)  
106 gloss (gloss distinctness-of-image) as in previous studies (Pellacini et al., 2000; Fleming et al., 2003;  
107 Nishio et al., 2014). For instance, Nishio et al. (2014) found neurons in the inferior temporal cortex  
108 (ITC) of monkeys that selectively and parametrically respond to gloss changes in these two  
109 dimensions. We also controlled the spatial consistency of specular highlights, which is another  
110 stimulus manipulation of gloss perception (Fig. 1, Task 6: GP). By breaking the spatial consistency,  
111 some highlights look like albedo changes by white paint (Beck & Prazdny, 1981; Kim et al., 2011;  
112 Marlow et al., 2011; Sawayama & Nishida, 2018). Besides gloss perception, translucency perception  
113 has also been widely investigated (Fleming & Bühlhoff, 2005; Motoyoshi, 2010; Nagai et al., 2013;  
114 Gkioulekas et al., 2013; Xiao et al., 2014; Chadwick et al., 2018). We adopted the task of  
115 discriminating opaque from translucent objects by controlling the thickness of the translucent media  
116 (Fig. 1, Task 3: OT). Furthermore, we adopted the task of plastic-yellow/gold discrimination  
117 (Okazawa et al., 2011, Task 4: MP) and glass/silver discrimination (Kim & Marlow, 2016; Tamura  
118 et al., 2019, Task 5: MG).

119       We used an oddity task (Fig. 3) to evaluate the capability of discriminating each material  
120 dimension. We chose this task because it requires neither complex verbal instruction, nor verbal  
121 responses by the observer. Therefore, it can be applied to a wide variety of observers including  
122 infants, animals, and machine vision algorithms, and their task performances can be directly  
123 compared. Indeed, several research projects using our dataset are underway (see the Discussion  
124 section).

125 To control the task difficulty, we varied the value of the parameter of each material dimension.  
126 In addition, we manipulated the stimulus in two ways that affected the task difficulty. First, we set  
127 three illumination conditions: one set of stimuli included images of different poses taken in identical  
128 illumination environments (Fig. 2a, Illumination condition 1); the second set contained stimuli of  
129 identical poses taken in slightly different illumination environments (Fig. 2a, Illumination condition  
130 2); the third set contained identical poses taken in largely different illumination environments (Fig.  
131 2a, Illumination condition 3). Second, we used the five different object geometries for each task  
132 (Fig. 2b).

133 We wish to collect data from a large number of observers. A laboratory experiment affords  
134 control over the stimulus presentation environment, but is unsuited to collecting a large amount of  
135 data from numerous participants. In contrast, one can collect a lot of data through crowdsourcing, at  
136 the expense of reliable stimulus control. To overcome this trade-off, we conducted identical  
137 psychophysical experiments both in the laboratory and through crowdsourcing. This enabled us to  
138 evaluate individual difference distributions along with the effects of environmental factors on task  
139 performance.

140 In sum, we made a large set of image stimuli for evaluations of visual discrimination  
141 performance on six material dimensions (gloss contrast, DOI (distinctness-of-image) of gloss,  
142 translucency-opaque, plastic-gold, glass-silver and glossy-painted) and measured a large number of  
143 adult human observers performing oddity tasks in the laboratory and through crowdsourcing. The  
144 tasks had three illumination conditions and five object geometries. Although the original motivation  
145 of this project was to make a standard stimulus-response dataset of material recognition for  
146 promotion of multidisciplinary studies, it also has its own scientific value as it is the first systematic  
147 comparison of the effects of illumination condition and object geometry, as well as of individual  
148 variations across a variety of material dimensions. Our data include several novel findings, as shown  
149 below.

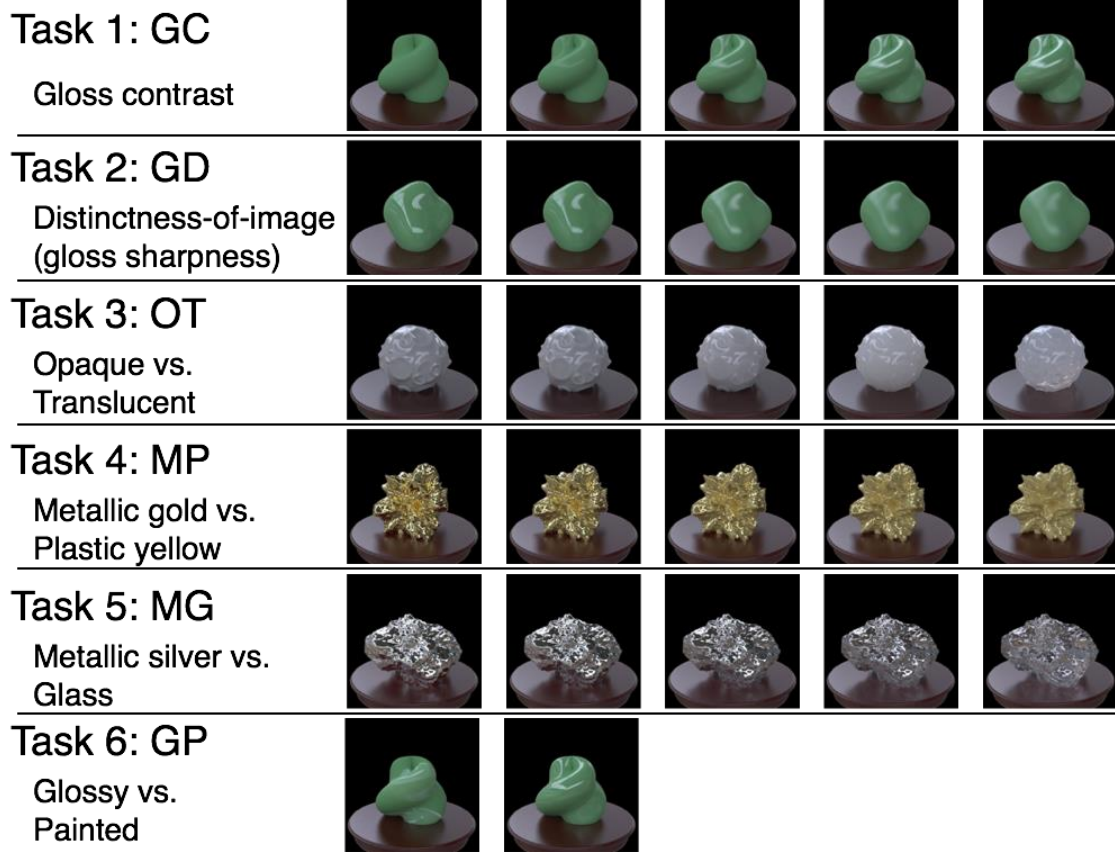

150

151 Figure 1. Schematic overview of six tasks recorded in the database.

152

153

154

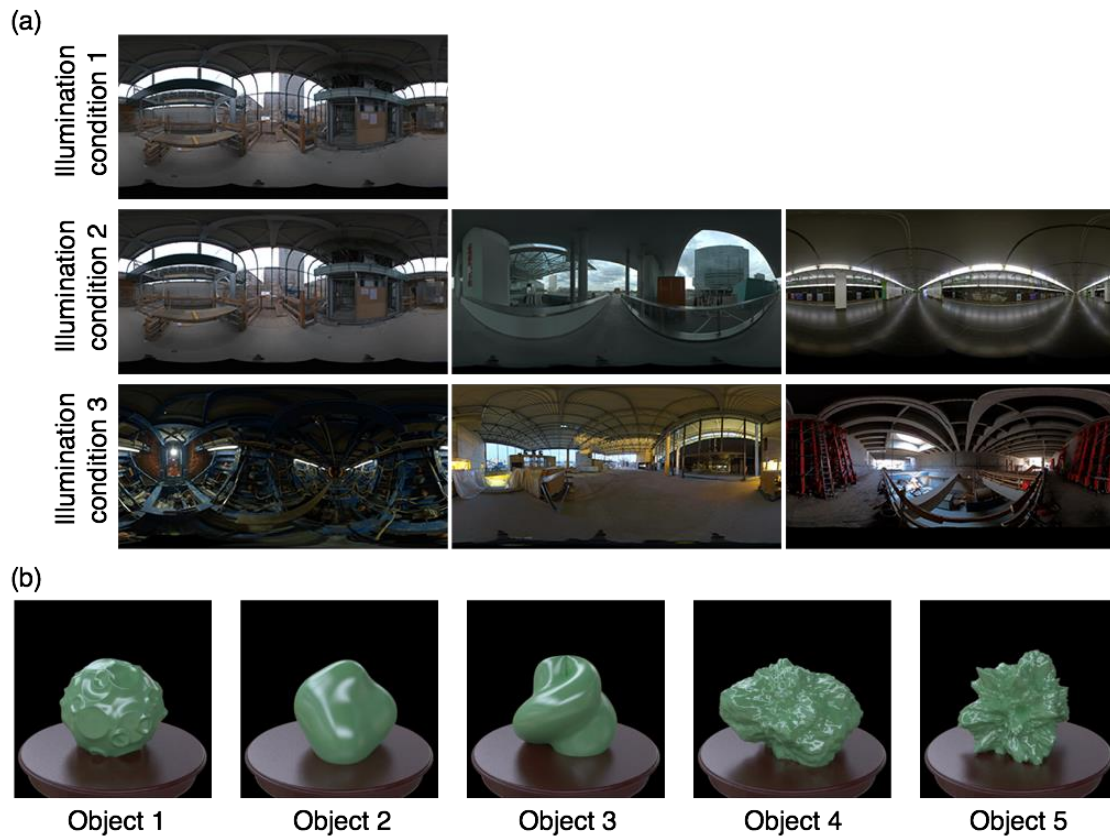

155

156 Figure 2. (a) Illumination conditions. Object images were rendered with six global  
157 illumination environments and were presented to observers under three illumination  
158 conditions. Under illumination condition 1, a stimulus display consisted of four objects  
159 (same shape, different poses) rendered with the same illumination environment. Under  
160 illumination condition 2, a stimulus display consisted of three objects (same shape, same  
161 pose) rendered with slightly different (in terms of their pixel histograms) light probes. Under  
162 illumination condition 3, a stimulus display consisted of three objects (same shape, same  
163 pose) rendered with largely different illumination environments. (b) Geometrical conditions.  
164 We used five different object shapes for each material task under each illumination  
165 condition. The stimulus condition is also summarized in Table 1.

166



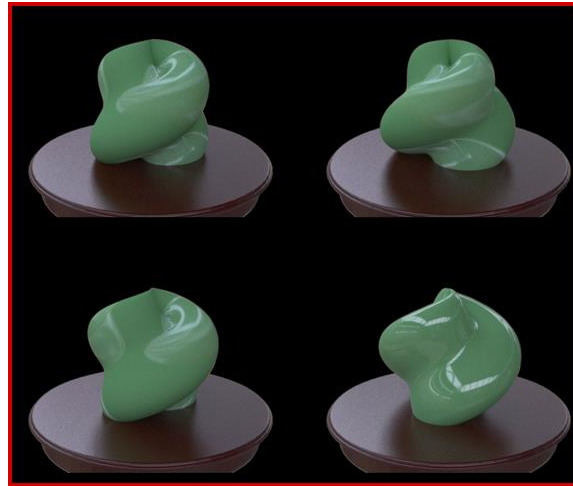

167

168 Figure 3. Example of a four-object oddity task (illumination condition 1) used for collecting  
 169 standard observer data. The observers were asked to select which image was the odd one  
 170 out in the four images. We did not tell the observer that the experiment was on material  
 171 recognition. We conducted experiments both in the laboratory and through crowdsourcing.

172

173

174

175 Table 1. The summary of stimulus condition. The digit in parentheses indicates the number  
 176 of each condition.

|                | Task1: GC                                  | Task2: GD                                  | Task3: OT                                  | Task4: MP                                  | Task5: MG                                  | Task6: GP                                  |
|----------------|--------------------------------------------|--------------------------------------------|--------------------------------------------|--------------------------------------------|--------------------------------------------|--------------------------------------------|
| Illumination 1 | Object (5)<br>Illumination (1)<br>Pose (5) | Object (5)<br>Illumination (1)<br>Pose (5) | Object (5)<br>Illumination (1)<br>Pose (5) | Object (5)<br>Illumination (1)<br>Pose (5) | Object (5)<br>Illumination (1)<br>Pose (5) | Object (5)<br>Illumination (1)<br>Pose (5) |
| Illumination 2 | Object (5)<br>Illumination (3)<br>Pose (1) | Object (5)<br>Illumination (3)<br>Pose (1) | Object (5)<br>Illumination (3)<br>Pose (1) | Object (5)<br>Illumination (3)<br>Pose (1) | Object (5)<br>Illumination (3)<br>Pose (1) |                                            |
| Illumination 3 | Object (5)<br>Illumination (3)<br>Pose (1) | Object (5)<br>Illumination (3)<br>Pose (1) | Object (5)<br>Illumination (3)<br>Pose (1) | Object (5)<br>Illumination (3)<br>Pose (1) | Object (5)<br>Illumination (3)<br>Pose (1) |                                            |

177

178

179



## 180 **Methods**

181 We evaluated the observers' performance of six material recognition tasks. We selected such  
182 tasks that had been used in previous material studies: 1) Contrast gloss discrimination (GC); 2)  
183 DOI (distinctness-of-image) discrimination (GD); 3) Opaque vs. translucent (OT); 4) Metallic  
184 gold vs. plastic yellow (MP); 5) Metallic silver vs. glass (MG); 6) Glossy vs. painted (GP). For  
185 each task, we used five geometry models and six global illuminations. We conducted behavioral  
186 experiments using an oddity task, which can be used even with human babies, animals, and  
187 brain-injured participants, because it does not entail complex verbal instructions. In the  
188 experiment, the observers were asked to select the stimulus that represented an oddity among  
189 three or four object stimuli. They were not given any feedback about whether their responses  
190 were correct or not. We controlled the task difficulty by changing the illumination and material  
191 parameters. To test the generality of the resultant database, we conducted identical experiments  
192 in the laboratory and through crowdsourcing.

193

### 194 **Image generation for making standard image database**

195 We utilized the physically-based rendering software called *Mitsuba* (Jakob 2010) to make  
196 images of objects consisting of different materials, and we controlled six different material  
197 dimensions.

198

199 *Material for tasks 1) Gloss discrimination (contrast dimension) (Task 1: GC) and 2) Gloss*  
200 *discrimination (DOI dimension) (Task 2: GD)*

201 To control the material property of the gloss discrimination tasks, we used the perceptual light  
202 reflection model proposed by Pellacini et al. (2000). They constructed a model based on the results  
203 of psychophysical experiments using stimuli rendered by the Ward reflection model (Ward, 1992)  
204 and rewrote the Ward model parameters in perceptual terms. The model of Pellacini et al. has two  
205 parameters, named  $d$  and  $c$ , and they roughly correspond to the DOI gloss and the contrast gloss of  
206 Hunter (1937). The difficulty of our two gloss discrimination tasks was controlled by separately  
207 modulating these two parameters.

208 The parameter space of the Ward reflection model can be described as follows.

$$\rho(\theta_i, \phi_i, \theta_o, \phi_o) = \frac{\rho_d}{\pi} + \rho_s \frac{\exp[-\tan^2 \delta / \alpha^2]}{4\pi \alpha^2 \sqrt{\cos \theta_i \cos \theta_o}},$$

209

210 where  $\rho(\theta_i, \phi_i, \theta_o, \phi_o)$  is the surface reflection model, and  $\theta_i$ ,  $\phi_i$ , and  $\theta_o$ ,  $\phi_o$  are the incoming and  
211 outgoing directions, respectively. The model has three parameters;  $\rho_d$  is the diffuse reflectance of a  
212 surface,  $\rho_s$  is the energy of its specular component, and  $\alpha$  is the spread of the specular lobe. Pellacini  
213 et al. (2000) defined two perceptual dimensions,  $c$  and  $d$  on the basis of the Ward model's

214 parameters.  $d$  corresponds to DOI gloss and is calculated from  $\alpha$ , while  $c$  corresponds to perceptual  
 215 glossiness contrast and is calculated from  $\rho_s$  and  $\rho_d$ , using the following formula:

$$d = 1 - \alpha$$

$$c = \sqrt[3]{\rho_s + \frac{\rho_d}{2}} - \sqrt[3]{\frac{\rho_d}{2}}$$

216

217 Although more physically feasible BRDF models than the Ward model have been proposed for  
 218 gloss simulation (Ashikmin et al., 2000; Walter et al., 2007), we based ours on the Ward model  
 219 because it has been used in many previous psychophysics and neuroscience studies (Nishio et al.,  
 220 2014).

221 For the task of gloss discrimination in the contrast dimension, the specular reflectance  $\rho_s$  was  
 222 varied in a range from 0.00 to 0.12 in 0.02 steps while keeping the diffuse reflectance  $\rho_d$  constant  
 223 (0.416), indicating the contrast parameter: 0, 0.018, 0.035, 0.052, 0.067, 0.082, and 0.097. The  
 224 distinctness-of-image  $d$  was the fixed value (0.94). (Fig. 4, Task 1: GC). As  $c$  gets closer to 0, the  
 225 object appears to have a matte surface. The specular reflectance  $\rho_s$  of the non-target stimulus in the  
 226 task was 0.06.

227 For the experiment of gloss discrimination in the DOI dimension, the parameter  $d$  was varied  
 228 from 0.88 to 1.00 in 0.02 steps while keeping  $\rho_s$  constant (0.06) (Fig. 4, Task 2: GD). As  $d$  gets  
 229 closer to 1.00, the highlights of the object appear sharper. The DOI parameter,  $d$ , of the non-target  
 230 stimuli was 0.94.

231

232

### Task 1: GC

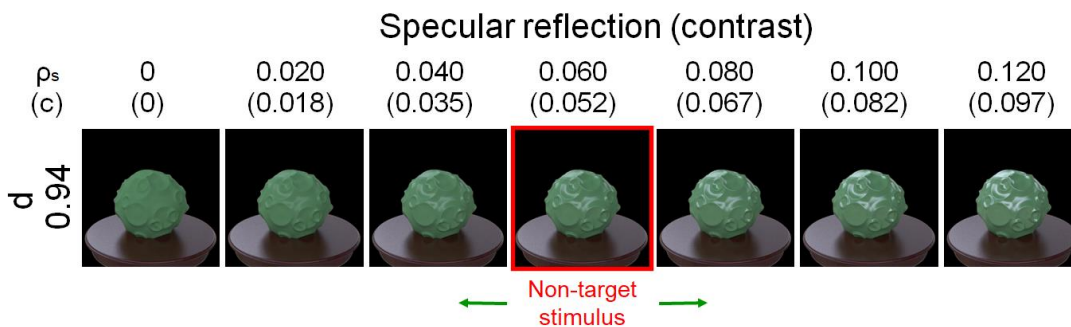

### Task 2: GD

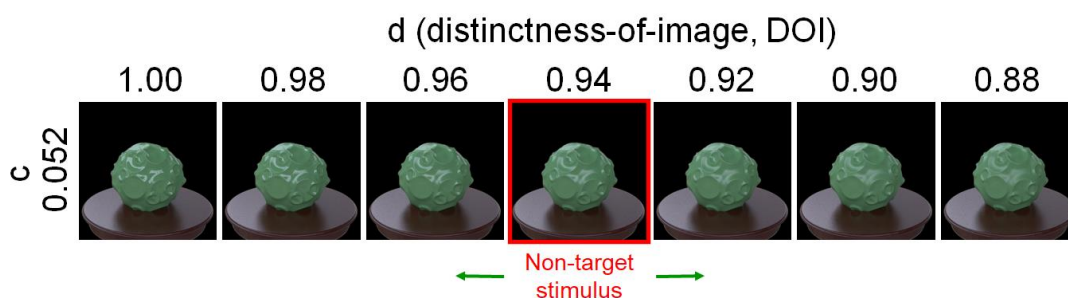

233

234 Figure 4. Material examples of tasks 1 (GC) and 2 (GD). For task 1 (GC), the specular  
235 reflectance of the odd target stimulus was varied from 0.00 to 0.12. The non-target stimuli  
236 that were presented as the context objects in each task had specular reflectance of 0.06.  
237 For task 2 (GD), the DOI parameter of the target specular reflection was varied from 1.00  
238 to 0.88, while that of the non-target stimuli was 0.94.

239

240 *Material for task 3) Opaque vs. Translucent (Task 3: OT)*

241 To make translucent materials, we used the function of homogeneous participating medium  
242 implemented in the Mitsuba renderer. In this function, a flexible homogeneous participating medium  
243 is embedded in each object model. The intensity of the light that travels in the medium is decreased  
244 by scattering and absorption and is increased by nearby scattering. The parameters of the absorption  
245 and scattering coefficients of the medium describe how the light is decreased. We used the  
246 parameters of the “Whole milk” measured by Jensen et al. (2001). The parameter of the phase  
247 function describes the directional scattering properties of the medium. We used an isotropic phase  
248 function. To control the task difficulty, we modulated the scale parameter of the scattering and  
249 absorption coefficients. The parameter describes the density of the medium. The smaller the scale  
250 parameter is, the more translucent the medium becomes. The scale parameter was varied as follows:  
251 0.0039, 0.0156, 0.0625, 0.25, and 1.00 (Fig. 5, Task 3: OT). The scale parameter of the non-target  
252 stimulus in the task was 1.00. In addition, the surface of the object was modeled as a smooth  
253 dielectric material to produce strong specular highlights, as in previous studies (Gkioulekas, I. et al,  
254 2013; Xiao et al., 2014). That is, non-target objects were always opaque, and the degree of  
255 transparency of the target object was changed.

### Task 3: OT

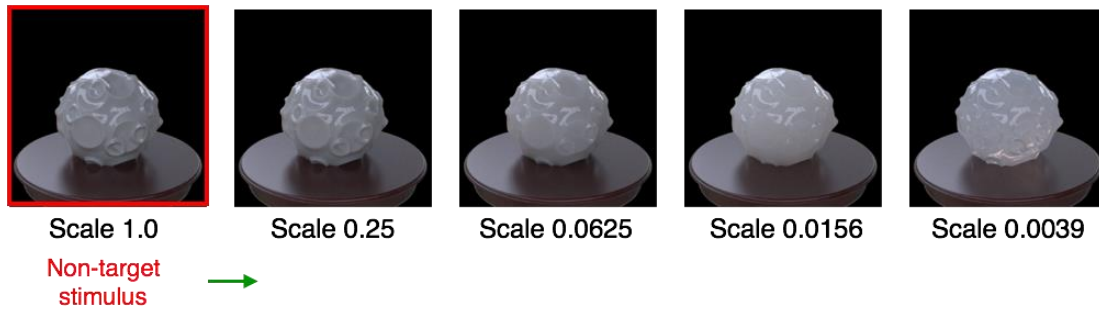

### Task 4: MP

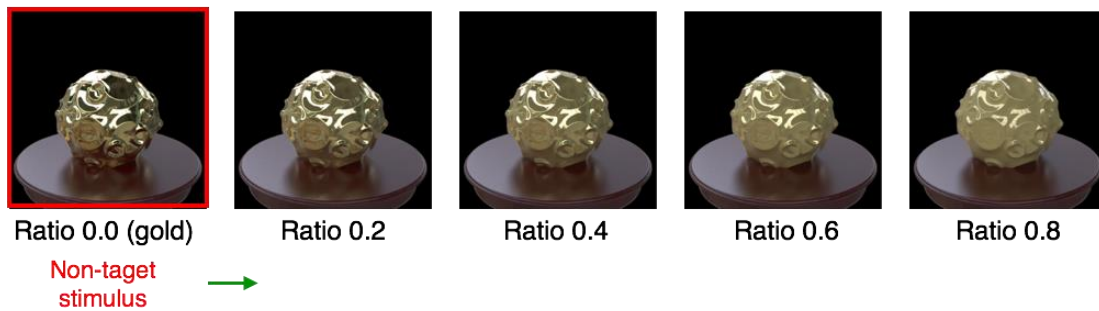

### Task 5: MG

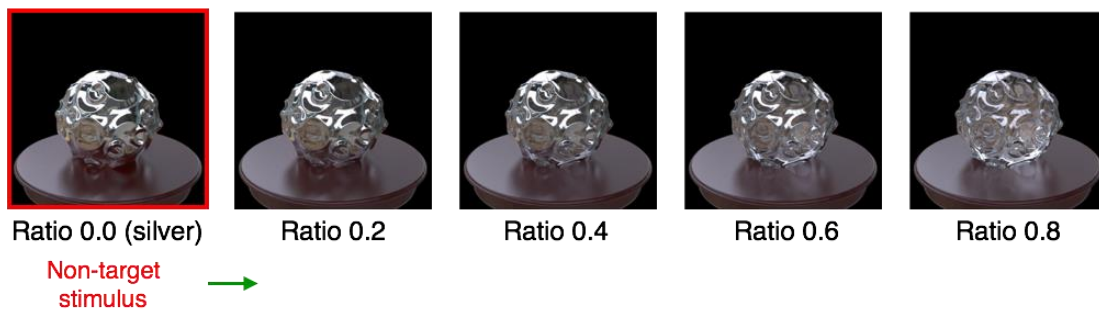

256

257 Figure 5. Material examples of tasks 3 (OT), 4 (MP), and 5 (MG). For task 3 (OT), the scale  
258 of the volume media that consisted of milk was varied from 1.0 to 0.0039. For task 4 (MP)  
259 and 5 (MG), the blending ratio of the two materials was varied from 0.0 to 0.8. The non-  
260 target stimuli in the tasks were shown as in the legend.

261

262 *Material for task 4) Metallic gold vs. Plastic yellow (Task 4: MP)*

263 To morph the material between gold and plastic yellow, we utilized a linear combination of gold  
264 and plastic BRDFs, which is implemented in the Mitsuba renderer. By changing the weight of the  
265 combination, the appearance of a material (e.g., gold) can be modulated toward that of the other  
266 material (e.g., plastic yellow). In this task, the weight was varied in a range from 0.00 to 0.80 in 0.20  
267 steps (Fig. 5, Task 4: MP). The parameter of the non-target stimulus was 0, at which the material  
268 appeared to be pure gold.

269

270 *Material for task 5) Metallic silver vs. Glass (Task 5: MG)*

271 Similar to task 4), we utilized a linear combination of dielectric glass and silver materials, which  
272 is also implemented in the Mitsuba renderer. The weight of the combination was varied from 0.00  
273 to 0.80. The parameter of the non-target stimulus was 0, at which the material appeared to be pure  
274 silver (Fig. 5, Task 5: MG).

275 As noted above, for Tasks 3, 4, and 5 in which the parameters of the target stimulus were varied  
276 between two material states (i.e., opaque vs. transparent, metallic vs. plastic, and metallic vs. glass),  
277 we placed the non-target objects at one end (i.e., one of two material states). If we placed the non-  
278 target stimuli in the middle of the stimulus variable as in Tasks 1 and 2, and when the difference  
279 between the target and non-target stimuli was small, the display only contained ambiguous material  
280 objects. In such cases, the observers might not pay attention to the material dimension relevant to  
281 the task. By placing the non-target at one extreme value, we could make the stimulus display always  
282 contain the object images in a specific material state, helping participants focus on the task relevant  
283 material dimension.

284 *Material for task 6) Glossy vs. Painted (Task 6: GP)*

285 The skewed intensity distribution due to specular highlights of an object image can be a  
286 diagnostic cue for gloss perception (Motoyoshi et al., 2007). However, when the specular highlights  
287 are inconsistent in terms of their position and/or orientation with respect to the diffuse shading  
288 component, they look more like white blobs produced by surface reflectance changes even if the  
289 intensity distribution is kept constant (Beck & Prazdny; 1981; Anderson & Kim, 2009; Kim et al.,  
290 2011; Marlow et al., 2011; Sawayama & Nishida, 2018). For our last task of glossy objects vs. matte  
291 objects with white paint, we rendered the glossy objects on the basis of Pellacini et al. (2000)'s  
292 model. The parameter  $c$  was set to 0.067, and the parameter  $d$  ranged from 0.88 to 1.00 in 0.04 steps  
293 (Fig. 6, lower). Considering material naturalness, these objects may not be typically encountered in  
294 the real world, but this task is theoretically important because it will provide insights into the  
295 underlying visual computation of material recognition.

296 To make object images with inconsistent highlights (white paints), we rendered each scene twice  
297 with different object materials with identical shapes. First, we rendered a glossy object image by  
298 setting the diffuse reflectance to 0, i.e., the image that includes only specular highlights. The  
299 rendered image of specular highlights was a 2D texture for the second rendering. We eliminated the  
300 brown table when rendering the first scene. Next, we rendered a diffuse object image, i.e., one  
301 without specular reflection, with the texture of specular highlights. The object and illumination for  
302 the first and second renderings were the same. We mapped the specular image rendered in one object  
303 pose to the 3D geometry by a spherical mapping with repeating the image. Since the position of  
304 texture mapping was randomly determined, the highlight texture positions were inconsistent with  
305 diffuse shadings. We varied the parameter  $d$  of the first rendering from 1.00 to 0.88 (Fig. 6, lower).

306 After we rendered the inconsistent-highlights image, the color histogram of the image was set to that  
307 of a consistent glossy object image by using a standard histogram matching method (Sawayama &  
308 Nishida, 2018).

309 We made task 6 only under Illumination 1. This is because it was hard to match the color  
310 distributions of the target and non-target stimuli for Illuminations 2 and 3, where one stimulus set  
311 was rendered under different illuminations. If we match the objects' color histograms under these  
312 conditions, the object's colors could be incongruent with their background colors (i.e., the table and  
313 the shadow in this scene). This could produce another cue to find an outlier, which making these  
314 conditions inappropriate for the task purpose.

315

### Task 6: GP

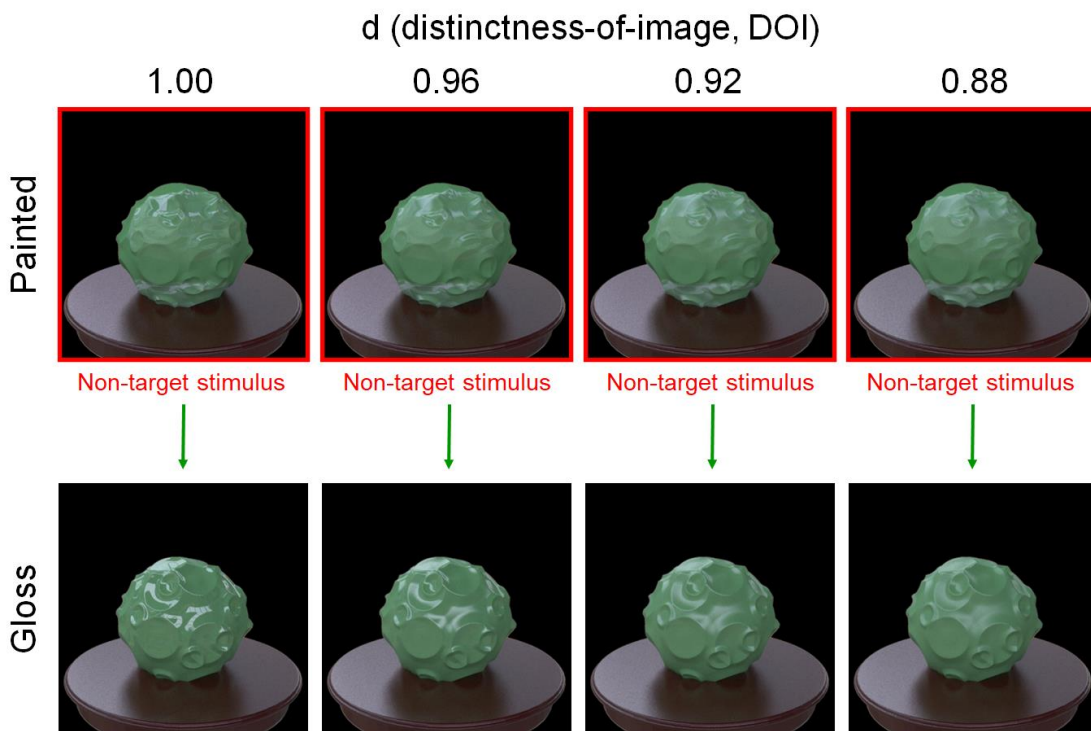

316

317 Figure 6. Material examples of task 6. The distinctness-of-image of the specular reflection  
318 was varied from 1.00 to 0.88. This parameter was the same for the non-target painted  
319 objects and the target glossy object in each stimulus display.

320

### 321 *Geometry*

322 For each material, we rendered the object images by using five different abstract geometries  
323 (Fig. 2b). These geometries were made from a sphere by modulating each surface normal direction  
324 with different kinds of noise (see also ShapeToolbox: <https://github.com/saarela/ShapeToolbox>)



325 (Saarela & Olkkonen, 2016, Saarela, 2018). Specifically, Object\_1 was made from modulations of  
326 low-spatial-frequency noise and crater-like patterns. The source code of this geometry is available  
327 on the web (<http://saarela.github.io/ShapeToolbox/gallery-moon.html>). Object\_2 was a bumpy  
328 sphere modulated by low-pass band-pass noise. Object\_3 was a bumpy sphere modulated by sine-  
329 wave noise. Object\_4 and Object\_5 were bumpy spheres modulated by Perlin noise. These objects  
330 were also rendered using Shapetoolbox.

331 Five samples were too small to systematically vary shape parameters. Instead, we handcrafted  
332 sphere-based abstract shapes in such a way expected to maximize the shape diversity. It is known  
333 that even when rendering with the same reflectance function (BRDF), objects with smooth/low-  
334 frequency surface modulations and those with spiky/high-frequency surface modulations could have  
335 very different material appearance (Shinya & Nishida, 1998, Vangorp, Laurijssen, & Dutré, 2007).  
336 We therefore created five geometries with a variety of low and high spatial frequency surface  
337 modulations to see human material perception under widely different geometry conditions.

### 338 *Illumination and pose*

339 We used six high-dynamic-range (HDR) light-probe images as illuminations for rendering.  
340 These images were obtained from Bernhard Vogl's light probe database  
341 (<http://dativ.at/lightprobes/>). To vary the task difficulty, we used three illumination conditions  
342 (illumination conditions 1, 2, and 3, Fig. 2a). Under illumination condition 1, the observers selected  
343 one oddity from four images in a task. We rendered the images by using an identical light probe  
344 (i.e., 'Overcast Day/Building Site (Metro Vienna)'). We prepared five poses for each task of  
345 illumination condition 1 by rotating each object in 36-degree steps; four of them were randomly  
346 selected in each task.

347 Under illumination condition 2, the observers selected one oddity from three images in a task.  
348 We created the images by using slightly different (in terms of their pixel histograms) light probes  
349 (i.e., 'Overcast Day/Building Site (Metro Vienna)', 'Overcast day at Techgate Donaueity', and  
350 'Metro Station (Vienna Metro)'). The task procedure of illumination condition 3 was the same as  
351 that of illumination condition 2. For illumination condition 3, we created the three images by using  
352 light probes that were rather different from each other ('Inside Tunnel Machine', 'Tungsten Light  
353 in the Evening (Metro Building Site Vienna)', and 'Building Site Interior (Metro Vienna)'). We  
354 computed the pixel histogram similarity for each illumination pair and used it as the distance for the  
355 multidimensional scaling analysis (MDS). We extracted three largely different light probes in the  
356 MDS space and used them for illumination condition 3. We also selected three similar light probes  
357 in the space and used them for illumination condition 2. The pose of each object in the illumination  
358 condition 2 and 3 was not changed. The stimulus condition is summarized in Table 1.

359



## 360 *Rendering*

361 To render the images, we used the integrator of the photon mapping method for tasks 1, 2, 4, 5,  
362 and 6 and used the integrator of the simple volumetric path tracer implemented in the Mitsuba  
363 renderer for task 3 (OT). The calculation was conducted using single-float precision. Each rendered  
364 image was converted into sRGB format with a gamma of 2.2 and saved as an 8-bit .png image.

365

## 366 **Behavioral experiments**

### 367 *Laboratory experiment*

368 Twenty paid volunteers participated in the laboratory experiment. Before starting the  
369 experiment, we confirmed that all had normal color vision by having them take the Farnsworth–  
370 Munsell 100 Hue Test and that all had normal or corrected-to-normal vision by having them take a  
371 simple visual acuity test. The participants were naïve to the purpose and methods of the experiment.  
372 The experiment was approved by the Ethical Committees at NTT Communication Science  
373 Laboratories.

374 The generated stimuli were presented on a calibrated 30-inch EIZO color monitor (ColorEdge  
375 CG303W) controlled with an NVIDIA video card (Quadro 600). Each participant viewed the stimuli  
376 in a dark room at a viewing distance of 86 cm, where a single pixel subtended 1 arcmin. Each object  
377 image of 512 x 512 pix was presented at a size of 8.5 x 8.5 degrees.

378 In each trial, four (Illumination 1) or three (Illumination 2 & 3) object images chosen for each  
379 task were presented on the monitor (Fig. 3). Measurements of different illumination conditions were  
380 conducted in different blocks. Under illumination condition 1, four different object images in  
381 different orientations were presented. Under illumination conditions 2 and 3, the three different  
382 object images had different illuminations. The order of illumination conditions 1, 2, and 3 was  
383 counterbalanced across observers. The observers were asked to report which of the object images  
384 looked odd by pushing one of the keys. The stimuli were presented until the observer made a  
385 response. The task instructions were simply to find the odd one with no further explanation about  
386 how it was different from the rest. The observers were not given any feedback about whether their  
387 response was correct or not. All made ten judgments for each task of illumination condition 1.  
388 Seventeen observers made ten judgments for each task of illumination condition 2, while three made  
389 only seven judgments due to the experiment's time limitation. Seventeen observers made ten  
390 judgments for each task of illumination condition 3, while three made seven judgments due to the  
391 experiment's time limitation.

392

393

## 394 Crowdsourcing experiment

395 In the web experiment, 416, 411, and 405 paid volunteers participated in the tasks of illumination  
396 conditions 1, 2, and 3, respectively. We recruited these observers through a Japanese commercial  
397 crowdsourcing service. All who participated under illumination condition 3 also participated under  
398 illumination conditions 1 and 2. Moreover, all who participated in illumination condition 2 had also  
399 participated under illumination condition 1. The experiment was approved by the Ethical  
400 Committees at NTT Communication Science Laboratories.

401 Each observer used his/her own PC's or tablet's web browser to participate in the experiment.  
402 We asked them to watch the screen from a distance of about 60 cm. Each object image was shown  
403 on the screen at a size of 512 x 512 pix. We didn't strictly control the visual angle of the image  
404 participants observed.

405 The procedure was similar to that of the laboratory experiment. In each trial, four or three object  
406 images that had been chosen depending on the task were presented on the screen, as in Fig. 3. The  
407 measurement was conducted under illumination condition 1 first, followed by one under  
408 illumination condition 2 and one under illumination condition 3. The observers were asked to report  
409 which of the object images looked odd by clicking one of the images. Each participant made one  
410 judgment for each condition. The other steps of the procedure were the same as those in the  
411 laboratory experiment.

412

## 413 Data analysis

414 For each oddity task, we computed the proportion that each participant got correct. The chance  
415 level of the correct proportion was 0.25 for illumination condition 1 and 0.33 for illumination  
416 conditions 2 and 3. We computed the sensitivity  $d'$  from each correct proportion by using a numerical  
417 simulation to estimate the sensitivity of the oddity task (Craven, 1992). We used the "Palamedes"  
418 data analysis library for the simulation (Kindom & Prins, 2010; 2016; Prins & Kingdom, 2018). To  
419 avoid values of infinity, we converted the one probability according to the total trial number (i.e.,  
420 corrected the one value to  $1-(1/2N)$ , where  $N$  is the total trial number) in the simulation (Macmillan  
421 & Kaplan, 1985). For the laboratory experiment, we computed the sensitivity  $d'$  of each observer  
422 and averaged it across observers. For the crowdsourcing experiment, since each observer engaged  
423 in each task one time, we computed the proportion correct for each task from all observers' responses  
424 and used it to compute  $d'$ .

425

426

## 427 Results

428 In this section, we describe the results of our benchmark data acquisition. First, we evaluate the  
429 environment dependency of our experiment, the performance difference between the online and  
430 laboratory experiments. Then, we describe the illumination and geometry effect on each task. After  
431 discussing each task, we show how intermediate visual features contribute to task performance. In  
432 the end, we analyze the individual difference in each task.

433

## 434 **Environment dependence**

435 For cross-cultural, cross-species, brain-dysfunction, and developmental studies, stimulus  
436 presentation on a monitor cannot always be strictly controlled because of apparatus or ethical  
437 limitations. Therefore, a performance validation of each task across different apparatuses is critical  
438 to decide which tasks the users of our database should select in their experimental environment.  
439 Figure 7a shows the results of the correlation analysis between the laboratory and crowdsourcing  
440 experiments. The coefficient of determination ( $R^2$ ) of the linear regression between the sensitivity  
441  $d'$  in the laboratory experiment and that of the crowdsourcing experiment is 0.83, indicating a high  
442 linear correlation. However, the slope of the regression is less than 1. This shows that the sensitivity  
443 of the crowdsourcing experiment was worse than that of the laboratory experiment, with many  
444 repetitions in general. These findings suggest that the present tasks maintain relative performance  
445 across different experimental environments.

446 Figure 7b shows the results for each task of the laboratory and crowdsourcing experiments in  
447 more detail. The coefficients of determination ( $R^2$ ) in tasks 1 to 6 are 0.60, 0.40, 0.86, 0.60, 0.62,  
448 and 0.39, respectively. The coefficient of task 6 (GP) was the worst, followed by task 2 (GD). As in  
449 the latter section, task 6 (GP) also showed large individual differences, and thus, the correlation  
450 between the laboratory and crowdsourcing experiments was decreased. The slope of the linear  
451 regression on task 2 (GD) was 0.44, and the proportion correct in the crowdsourcing experiment for  
452 tasks 2 were generally lower than those in the laboratory for tasks 2. In the laboratory experiment,  
453 we used a 30-inch LCD monitor, and the stimulus size of each image was presented at a size of 8.5  
454 x 8.5 degrees, which we expected to be larger than when participants on the web observed the image  
455 on a tablet or PC. Task 2 (GD) is related to the distinctness-of-image of the specular reflection, and  
456 thus, the spatial resolution might have affected the accuracy of the observers' responses, although  
457 the relative difficulty for task 2 (GD) even in the crowdsourcing experiment was similar to that in  
458 the laboratory experiment. These findings suggest that the absolute accuracy of task 2 (GD) depends  
459 largely upon the experimental environment.

460

461

462

(a) All tasks

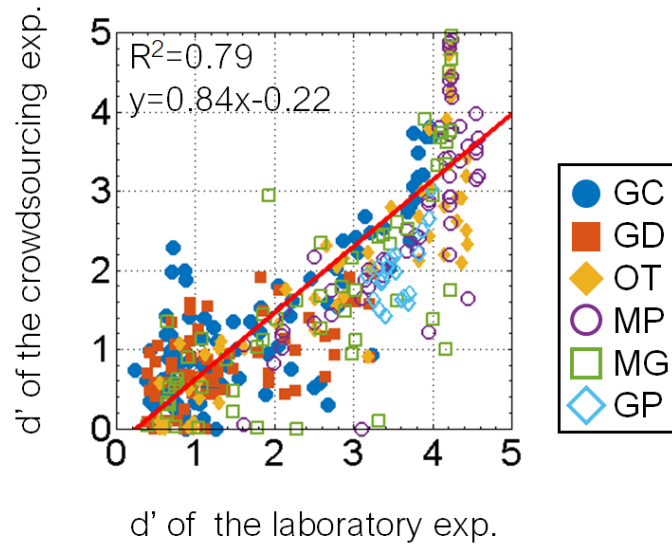

(b) Individual tasks

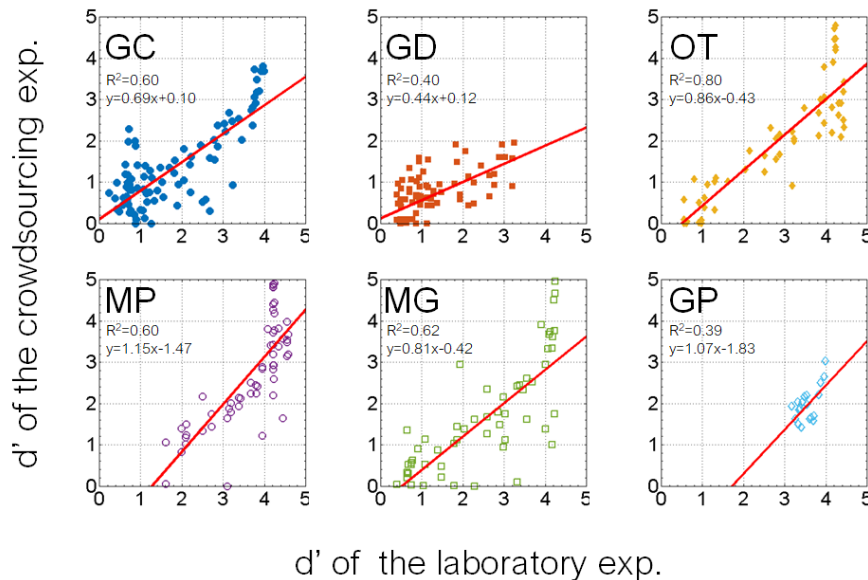

463

464 Figure 7. Results of laboratory and crowdsourcing experiments. The sensitivity  $d'$  in each  
 465 task in the crowdsourcing experiment is plotted as a function of that in the laboratory  
 466 experiment. (a) Results of all tasks. Each plot indicates a task with an object, an  
 467 illumination, and a difficulty. The red line indicates the linear regression between the  
 468 crowdsourcing and laboratory results. The coefficient of determination ( $R^2$ ) of the  
 469 regression and the equation are shown in the legend. The results show that the present  
 470 tasks are generally robust across experimental environments. (b) Results of individual  
 471 tasks. Different panels indicate tasks involving different materials. Each plot in a panel  
 472 indicates a task with an object, illumination, and difficulty. The red line indicates the linear  
 473 regression between the laboratory and crowdsourcing results. The coefficient of  
 474 determination ( $R^2$ ) of the regression and the equation are shown in the legend. The

475 accuracy of task 2 (GD) in the crowdsourcing experiment was generally lower than that in  
476 the laboratory experiment. The correlation of task 6 (GP) between the laboratory and  
477 crowdsourcing experiments was the worst.

478

## 479 **Illumination and geometry**

480 Figures 8 to 13 show the performance of each task in the laboratory experiment. Different panels  
481 depict results obtained for different objects. Different symbols in each panel depict different  
482 illumination conditions. The results of the crowdsourcing experiment are shown in Appendix A. For  
483 task 1 to task 5 (Figures 8 to 12), we parametrically changed the material parameters, e.g., the  
484 contrast dimensions for task 1 (GC). Results show that the discrimination accuracy increased as the  
485 target material parameters deviated from the non-target one. This trend can be most evidently  
486 observed for Illumination 1 on each task condition. In contrast, the accuracy didn't change much  
487 with the material parameters for some conditions. This trend can be observed on Illuminations 2 and  
488 3 of task 1 (GC) and Objects 4 and 5 of task 2 (GD). For task 6, the relation of target and non-target  
489 stimuli is different from the other tasks. In this task, the non-target stimulus was made for each  
490 material parameter, i.e. the distinctness-of-image (DOI). As shown in Figure 13, this material  
491 parameter didn't affect the task difficulty.

492 By comprehensively assessing material recognition performance across different stimulus  
493 conditions, we found novel properties that have been overlooked in the previous literature. One  
494 regards the geometrical dependence of material recognition. When object images changed in the  
495 gloss – distinctness-of-image dimension (task 2: GD, Fig. 9), the observers could detect the material  
496 difference better for smooth objects (Object 2 & 3) than for rugged objects (Object 4 & 5). In  
497 contrast, when the object images changed in the glossiness-contrast dimension (task 1: GC, Fig. 8),  
498 little geometrical dependence was found. We also found little geometrical dependence when  
499 observers detected highlight-shading consistency (task 6: GP, Fig. 13). While geometrical  
500 dependencies of glossiness perception have been reported before (Nishida & Shinya, 1998; Vangorp,  
501 Laurijssen, & Dutré, 2007), they were mainly about the effects of shape on apparent gloss  
502 characteristics, not on gloss discrimination. Furthermore, our results also show a geometrical  
503 dependence of translucency perception (task 3: OT, Fig. 10). Similar to the dependence on the  
504 distinctness-of-image dimension, the sensitivity changed between the smooth objects (Object 2 &  
505 3) and rugged objects (Object 4 & 5), but in the opposite way. Specifically, the translucent difference  
506 was more easily detected for the rugged objects than for the smooth objects (Fig. 10).

507

508

509

## Task 1: GC

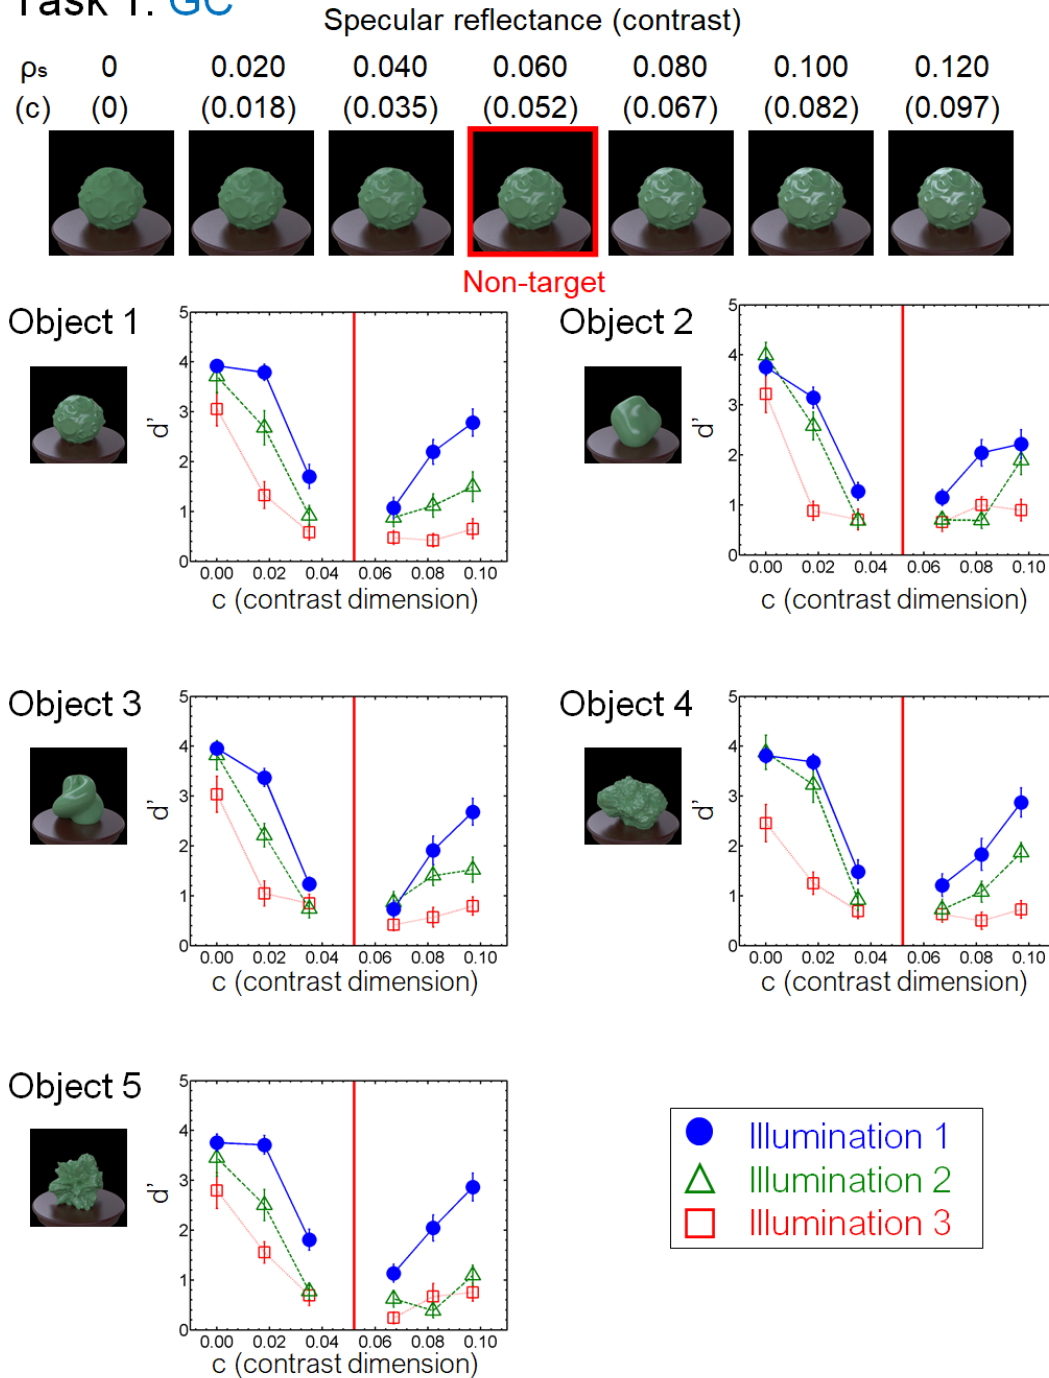

510

511 Figure 8. Results of task 1 (GC) in the laboratory experiment. Different panels show  
 512 different objects. Different symbols in each panel depict different illumination conditions.

513 The vertical red line in each panel indicates the parameter of the non-target stimulus. Error  
 514 bars indicate  $\pm 1$  SEM across observers.

515

516

## Task 2: GD

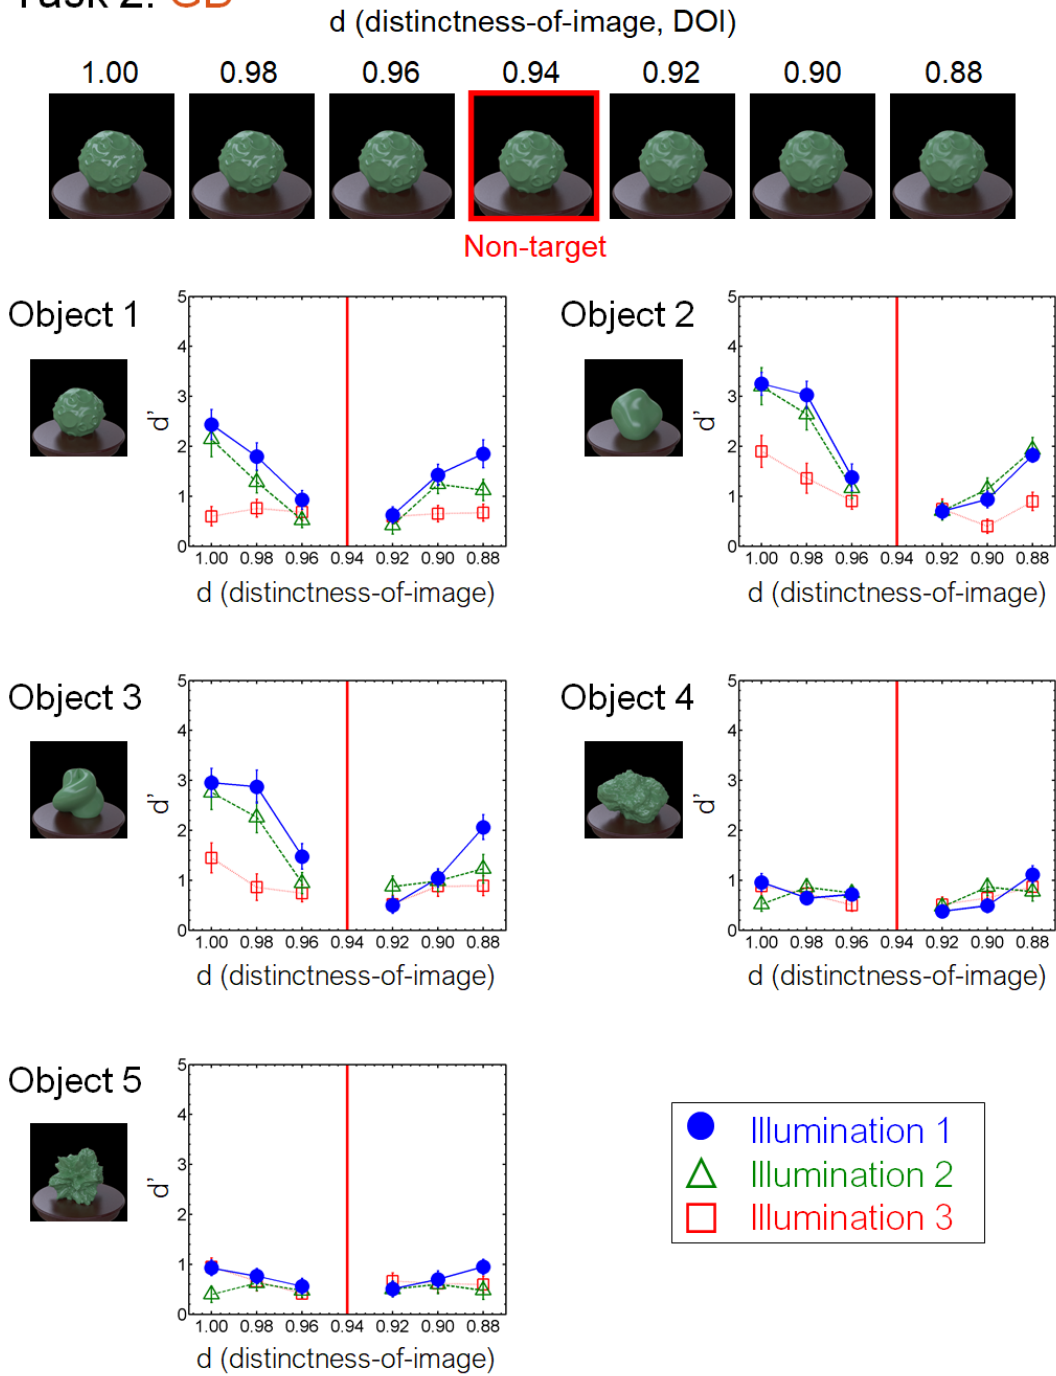

517

518 Figure 9. Results of task 2 (GD) in the laboratory experiment.

519

520



### Task 3: OT

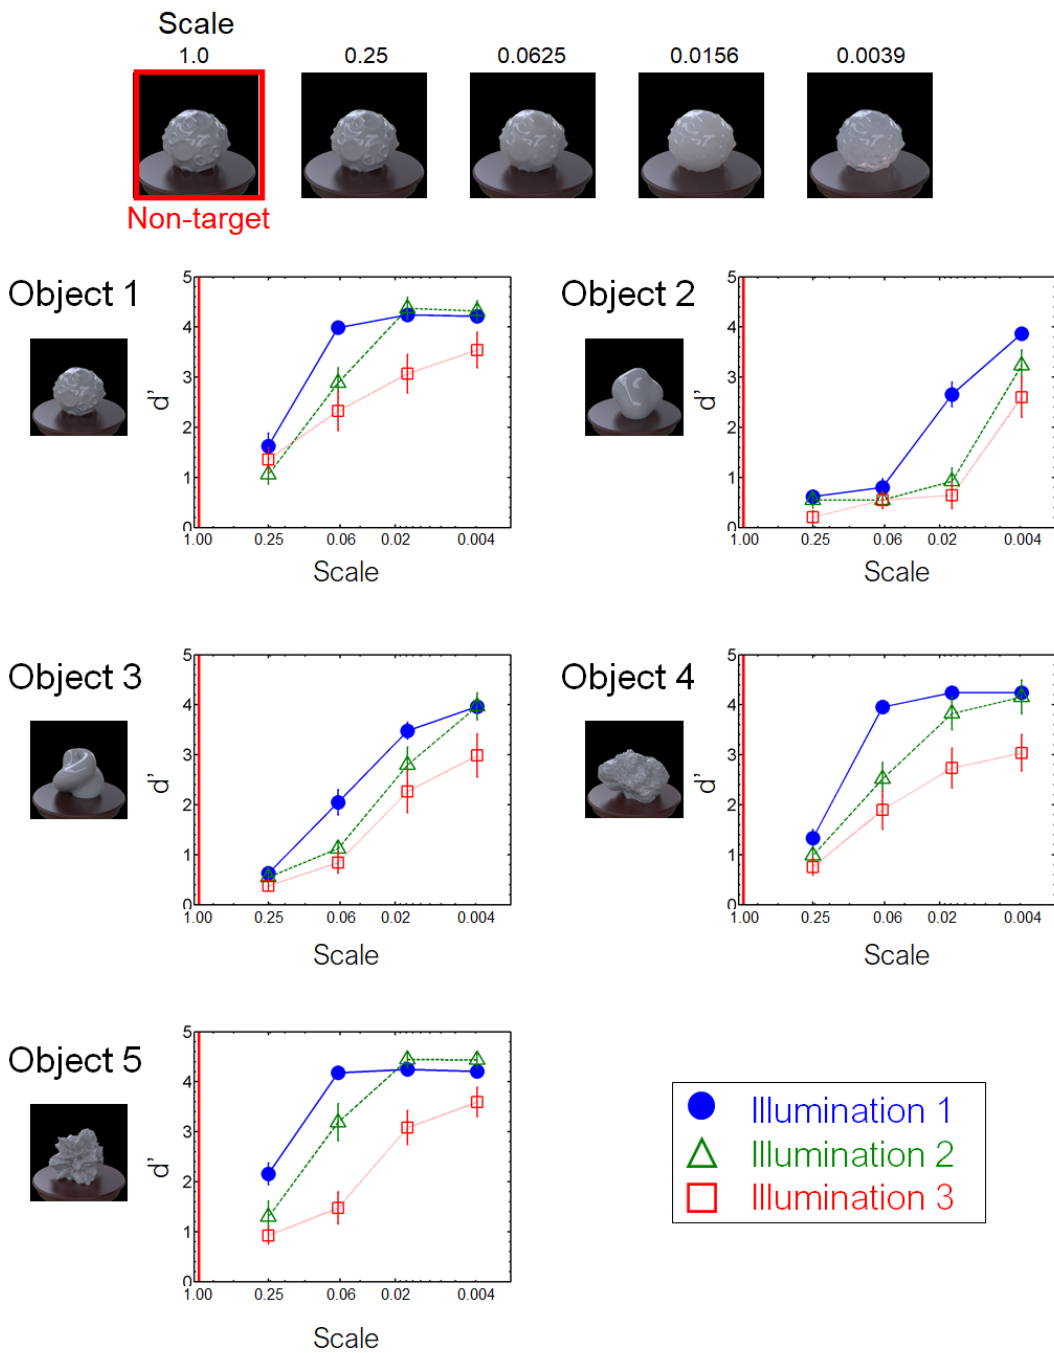

521

522 Figure 10. Results of task 3 (OT) in the laboratory experiment.

523

524

## Task 4: MP

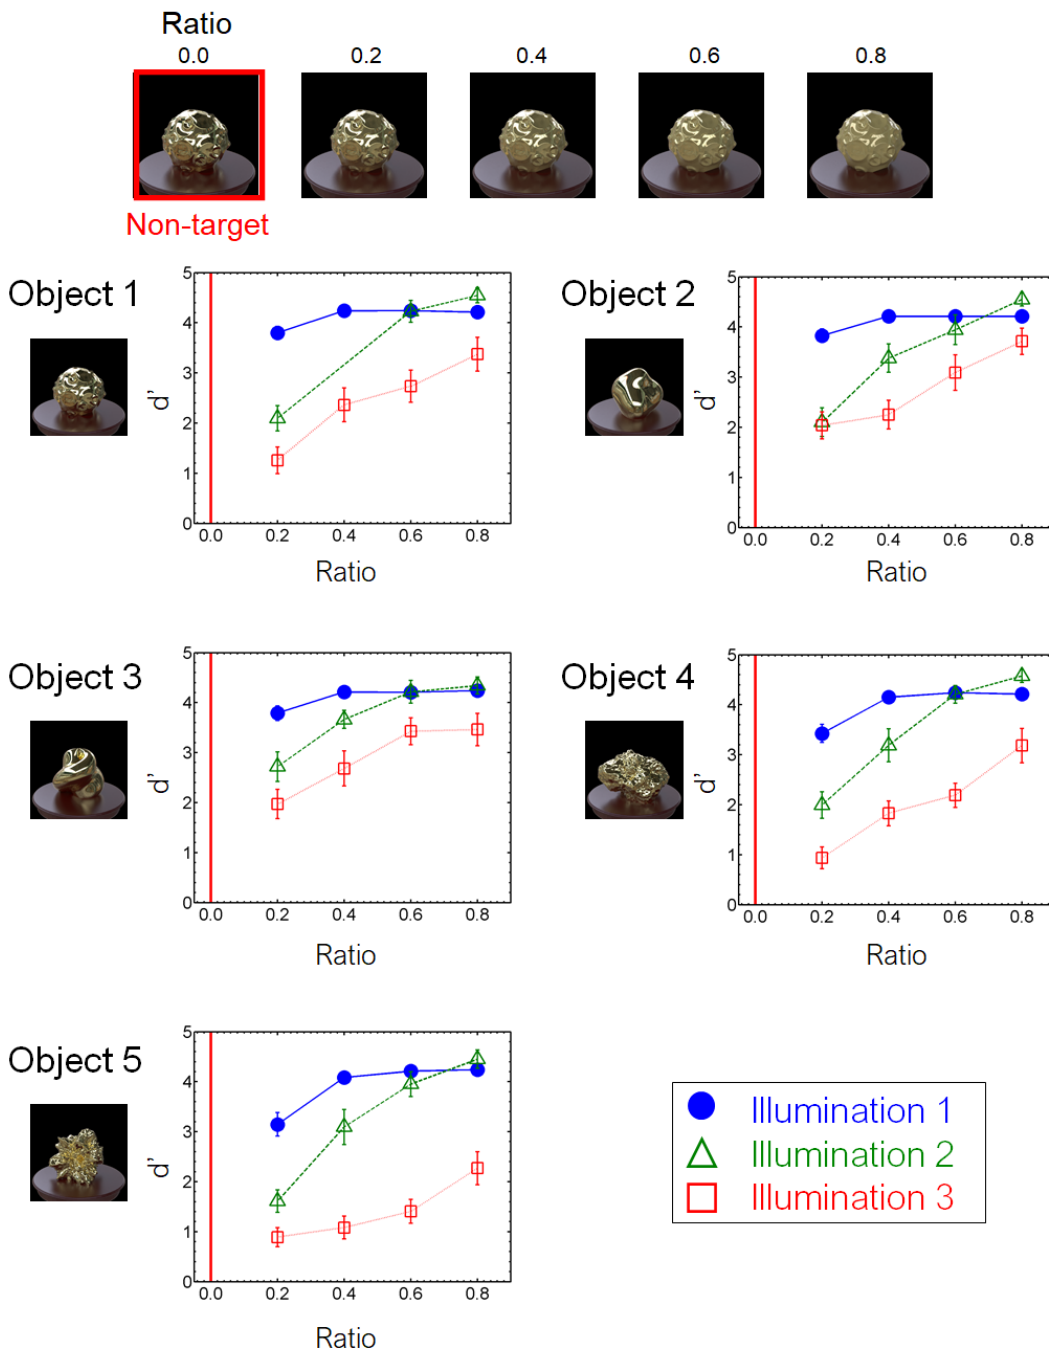

525

526 Figure 11. Results of task 4 (MP) in the laboratory experiment. One of the observer data

527 on Object 1 and Illumination 2 is missing due to a mistake in the stimulus presentation.

528

529

## Task 5: MG

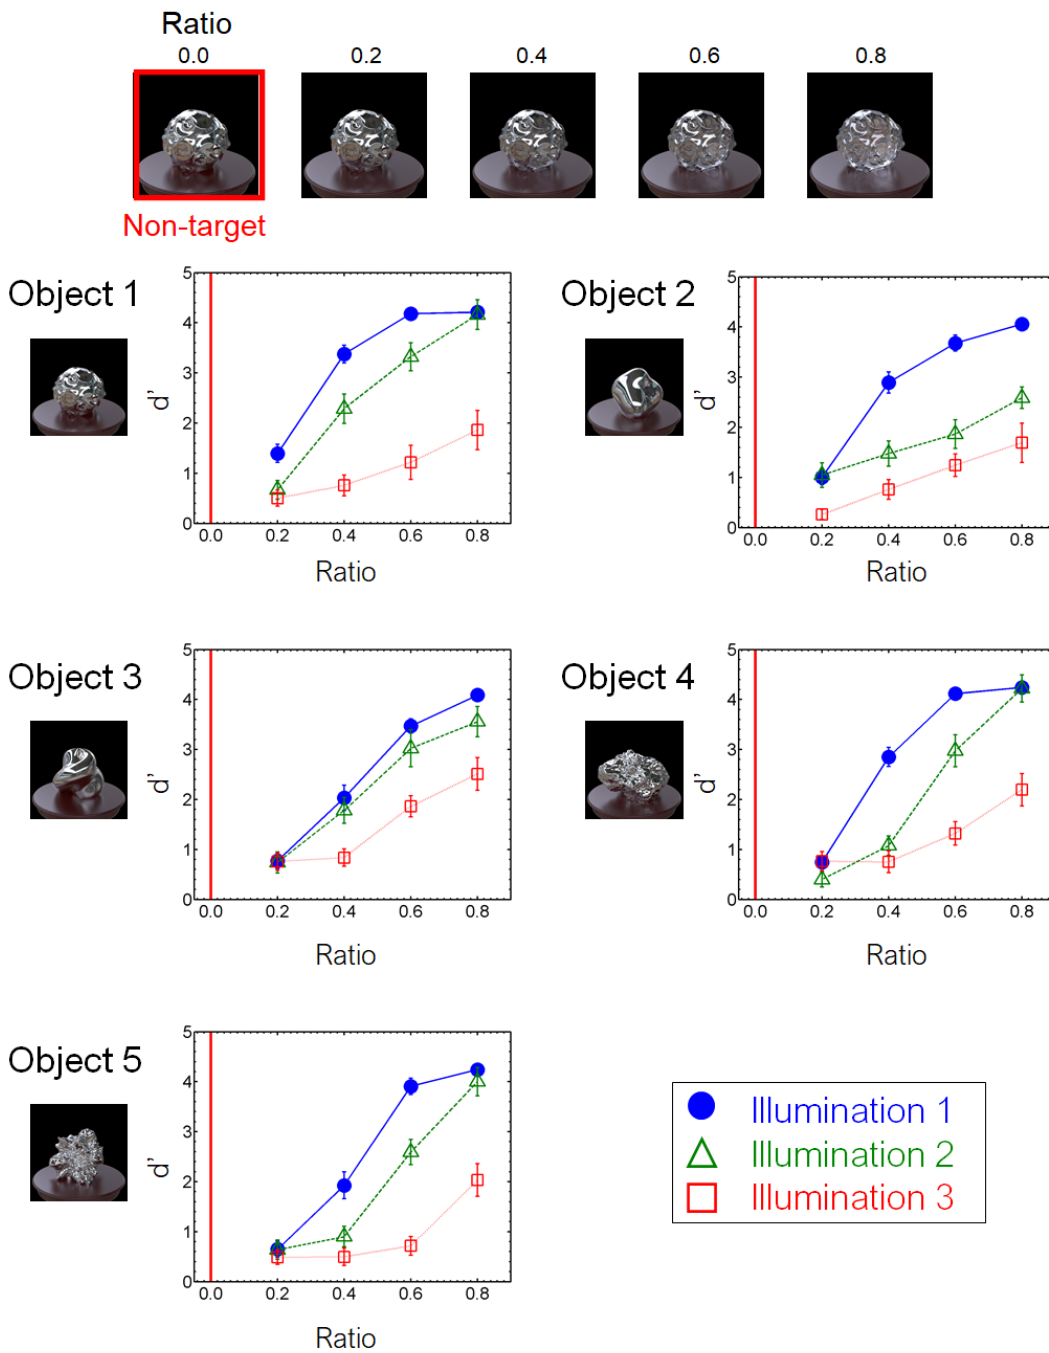

530

531 Figure 12. Results of task 5 (MG) in the laboratory experiment.

532

533

## Task 6: GP

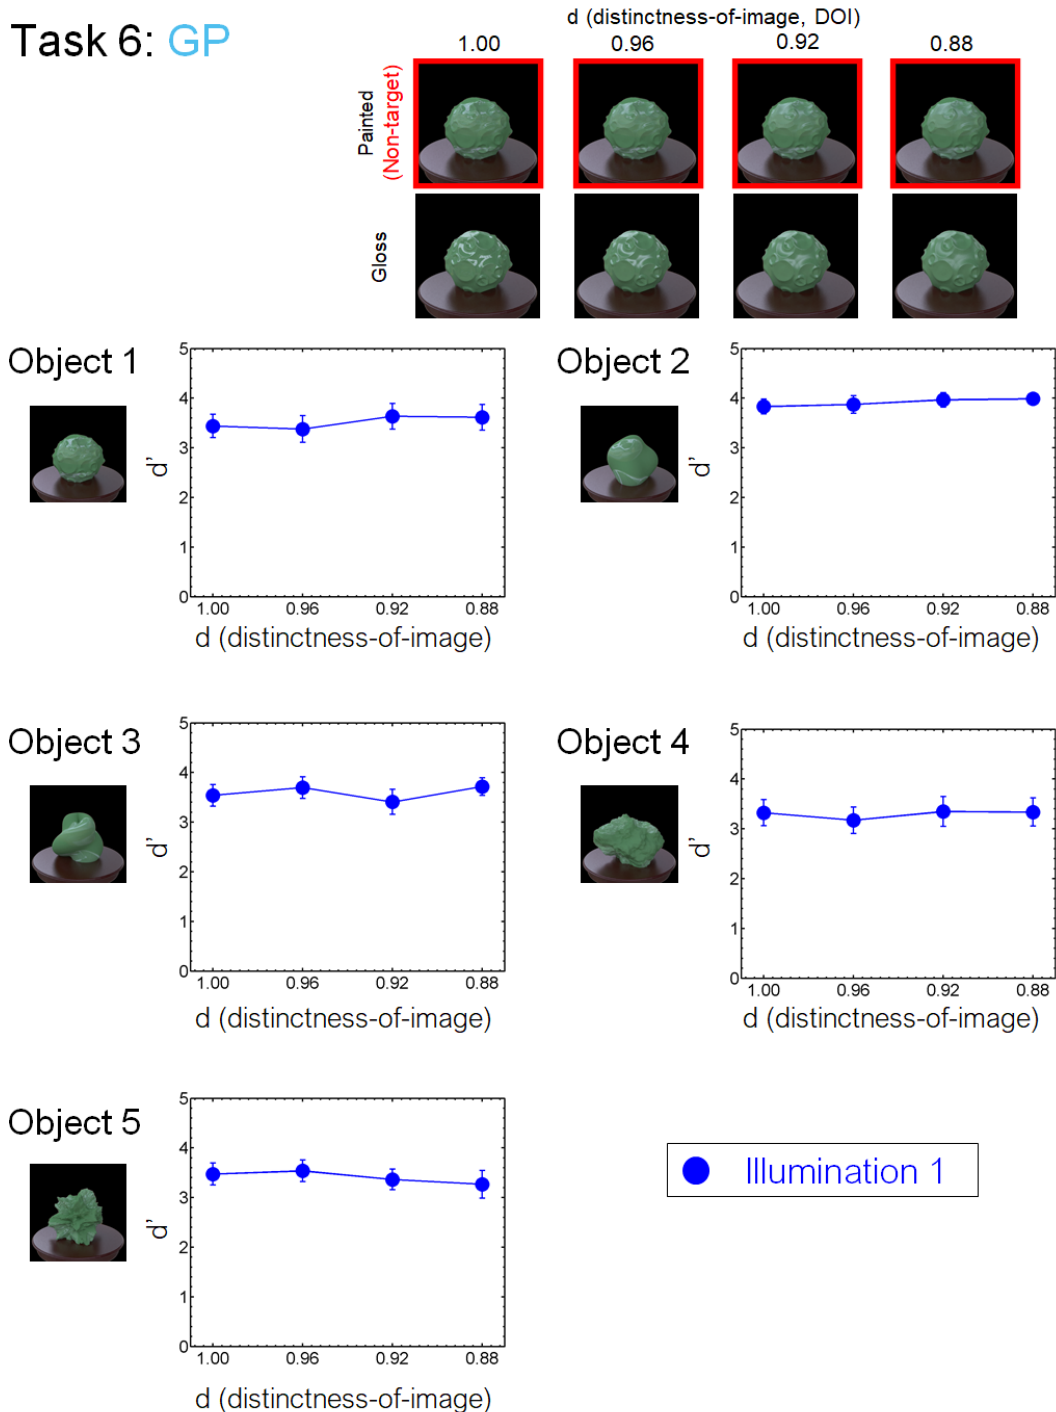

534

535 Figure 13. Results of task 6 (GP) in the laboratory experiment.

536

537

538 We also found an illumination dependence in material recognition. We used three illumination  
 539 conditions, wherein the illumination environments used in a task were identical (Illumination 1),  
 540 similar to each other (Illumination 2), or largely different from each other (Illumination 3). The  
 541 results showed that task accuracy decreased as the difference in light probes across the images  
 542 increased from Illumination 1 to 2 and 3 (Figs. 8-13). This finding not only confirms the large effect  
 543 of illumination on gloss perception reported before (Fleming et al., 2003; Motoyoshi & Matoba

544 2012; Zhang et al., 2019), but also demonstrates similarly strong effects of illumination on other  
545 material discrimination tasks (OT, MP and MG).

546

### 547 **Intermediate visual feature analysis**

548 One may raise a concern that our observers might make oddity judgments based on differences  
549 in low-level superficial image properties such as the object's mean color. We did not explicitly ask  
550 the observers to select one object image in terms of the material appearance. This procedure could  
551 lead observers to take a simple strategy unrelated to material judgment. A related question is that, if  
552 not such simple properties, is there any intermediate image features in hierarchical visual processing  
553 that can explain the observers' responses? Recent studies have shown that the intermediate  
554 processing in the ventral visual stream of humans and monkeys encodes the higher-order image  
555 features as computed in texture synthesis algorithms or deep convolutional neural networks  
556 (Freeman et al., 2013; Okazawa, Tajima, Komtsu, 2014; 2016, Yamins & Dicarlo, 2015). It has been  
557 suggested that the processing in the visual ventral stream also mediates material recognition for  
558 static objects (Nishio et al., 2012; 2014, Miyakawa et al., 2017). We asked how such intermediate  
559 features possibly processed in material computation can explain the observers' responses.

560 More specifically, we analyzed how various image feature differences on each task can explain  
561 the observers' task performance. Each task, i.e., a material dimension with an object under an  
562 illumination condition, includes a set of material objects with different combinations of poses  
563 (Illumination condition 1) or illuminations (Illumination conditions 2 and 3). These combinations  
564 are used as repetition for the behavioral experiment. In the analysis, we chose all combinations for  
565 each task and calculated the mean feature distance. We calculated this distance metric using various  
566 image features (e.g., pixel statistics or texture statistics) as described below in detail. If the distance  
567 metric of each image feature is correlated with human performance, the feature can be diagnostic  
568 for human judgments.

569 We linearly regressed the discrimination sensitivity  $d'$  for each task using the distance metric  
570 calculated from various image features. Specifically, we used the texture parameters originally  
571 proposed in the literature of texture synthesis by Portilla & Simoncelli (2000). They suggested that  
572 natural textures can be synthesized by the probabilistic summary statistics derived from the pixel  
573 histogram and the subband distribution, including higher-order statistics such as the correlations  
574 across the subband filter outputs. More recently, many studies have shown that the intermediate  
575 visual processing in the ventral stream, such as V2 or V4, encodes these texture parameters (Freeman  
576 et al., 2011; Okazawa et al., 2013). Following the previous studies (Okazawa et al., 2013), we  
577 reduced the original texture parameters by removing redundant features because a large number of  
578 parameters make the fitting unreliable. Specifically, we conducted the same reduction as Okazawa  
579 et al. (2013), except that 1) we included the mean, sd, and kurtosis of the marginal statistics, as well  
580 as the skewness and that 2) we calculated these statistics not only for grayscale images (CIE L\*  
581 image) but also for color images (CIE a\* and CIE b\* images). We defined the white XYZ value

582 averaging the diffuse white sphere rendered under each illumination condition and used it to  
583 calculate the CIE  $L^*$ ,  $a^*$ , and  $b^*$  of each image. We extracted the center 128 x 128 pixels of each  
584 image and calculated the texture parameters using the texture synthesis algorithm by Portilla &  
585 Simoncelli (1999) with four scales and four orientations. We reduced these original texture  
586 parameters of each  $L^*$ ,  $a^*$ , or  $b^*$  image to 32 parameters following Okazawa et al. (2013). More  
587 details are described in the supplementary tables S1 and S2 of Okazawa et al. (2013). In total, we  
588 used 96 parameters for the regression analysis.

589 We conducted five regressions with different types of parameters to explore the contribution of  
590 different statistics. Specifically, we used (1) pixel color means, (2) pixel color statistics, (3) Portilla  
591 & Simoncelli's (PS) grayscale texture statistics, (4) PS grayscale statistics, and pixel color statistics,  
592 (5) PS color statistics. The pixel color means and the pixel color statistics were the marginal statistics  
593 in the PS texture statistics. The pixel color means indicated the averaged pixel values of each  $L^*a^*b^*$   
594 channel. The pixel color statistics indicated the mean, standard deviation, skewness, and kurtosis of  
595 each color channel. The number of these parameters was 3 and 12, respectively. For the two  
596 conditions, we used a linear regression without regularization to fit the discrimination sensitivity  
597 (blue and red in Fig. 14). For the three PS texture statistics conditions (yellow, purple, and green in  
598 Fig. 14, respectively), we used the compressed PS statistics as described above. Since the number  
599 of parameters for these conditions is large (32, 48, 96, respectively), we used L1-penalized linear  
600 least-squares regression (i.e., lasso) to avoid overfitting. We controlled the hyperparameters so that  
601 the number of independent variables is 18, where the regression of the PS grayscale statistics  
602 condition showed the minimum mean-squared error (MSE).

603 We divided all tasks into training and test datasets with a ratio of four to one, respectively, and  
604 conducted the above five regressions. The task ratio was kept constant across the training and test  
605 datasets. For the training dataset on the lasso regressions, we regressed the discrimination sensitivity  
606 using the 5-fold-cross validation. Figure 14 shows the MSE and the determinant coefficient for the  
607 test datasets. We resampled the training and test datasets 10000 times and depicted the distribution  
608 using a violin plot. First, the predictions based on the color mean statistics didn't match the observers'  
609 discrimination sensitivity at all (Fig. 14a and 14b). These results suggest that the observers did not  
610 simply rely on the mean differences to perform the oddity tasks. The MSE and the determinant  
611 coefficient for the marginal statistics condition were more improved when we added the higher-  
612 order statistics (marginal statistics condition, PS grayscale statistics condition, and PS color statistics  
613 condition). Since the regularization parameter is controlled under the PS color and grayscale  
614 statistics conditions, these results cannot be ascribed to the number of independent variables. It is  
615 noteworthy that even when all the PS color statistics are used, the prediction is not sufficient to  
616 explain observers' discrimination performance. This finding suggests that human material judgments  
617 also rely on higher-order features the PS statistics do not cover. One possible future direction is to  
618 use the intermediate activation of the deep neural networks. To support this direction, we include in  
619 our database the activation data of VGG-19, a feedforward convolutional neural network, for our  
620 image dataset and the analysis about how the dataset is represented in each layer (Appendix C). In

621 short, our dataset images were clustered in higher layers of the pretrained network according to  
622 object differences, and the material differences were represented in each object cluster.  
623  
624

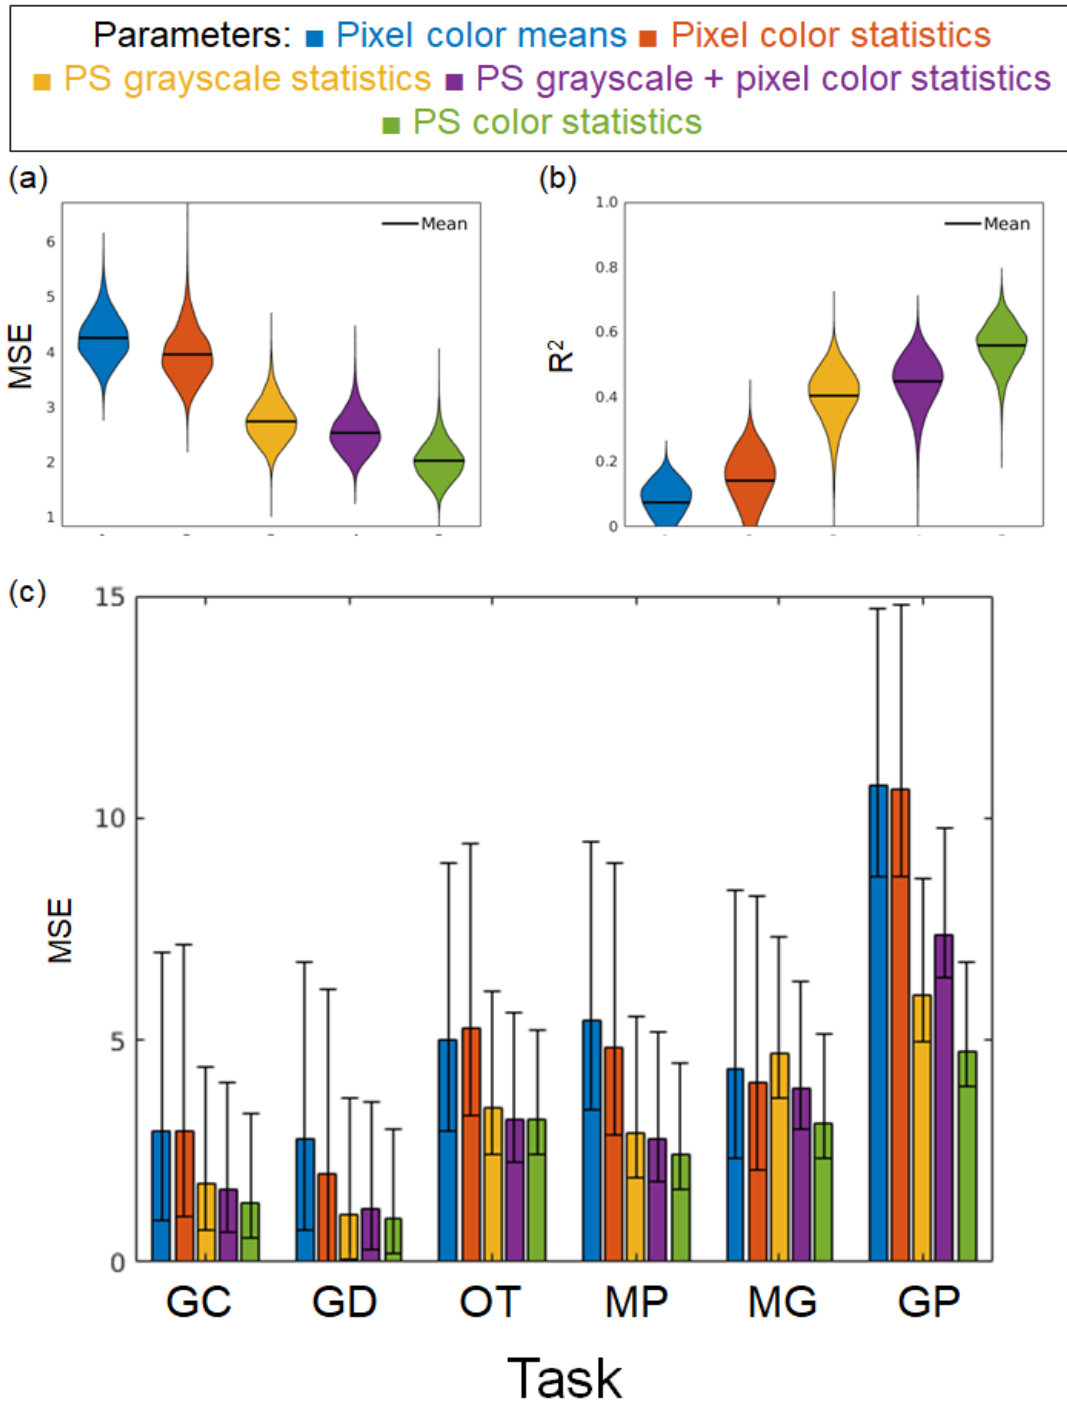

625  
626 Figure 14. Results of the linear regressions using different parameters. We regressed the  
627 human discrimination performance on pixel color means (3 parameters, blue), pixel color  
628 statistics (12 parameters, red), Portilla & Simoncelli's (PS) grayscale texture statistics  
629 (regularized 18 parameters, yellow), PS grayscale statistics and pixel color statistics



630 (regularized 18 parameters, purple), or PS color statistics (regularized 18 parameters,  
 631 purple). (a) Results of the mean squared error (MSE) for each regression. (b) Results of  
 632 the mean squared error for each regression. These results are shown using a violin plot.  
 633 (c) Results of the MSEs for each task. The error bars indicate the bootstrap 95% confidence  
 634 intervals.

635

636

637

### 638 Individual differences

639 Next, we evaluated the individual differences of each task in the Japanese adult population.  
 640 Figure 15 shows the histogram of the response accuracy for each observer in the crowdsourcing  
 641 experiment. The number of observers of illumination conditions 1, 2, and 3 was 416, 411, and 405,  
 642 respectively. For each condition, the probability of a correct response was calculated by averaging  
 643 the responses of each observer across objects and task difficulties. The standard deviations of tasks  
 644 1 to 6 under illumination condition 1 are .14, .11, .12, .12, .12, and .23, indicating a particularly large  
 645 individual difference for task 6 (GP). The standard deviation under illumination conditions 2 and 3  
 646 ranged from .09 to .18. It should be also noted that most of the conditions show unimodal  
 647 distributions, while task 6 (GP) shows a nearly uniform distribution. This finding suggests that  
 648 individual differences in discrimination ability of the spatial consistency of specular highlights are  
 649 larger than those for other material properties, including glossiness contrast and distinctness-of-  
 650 image (GC, and GD).

651

652

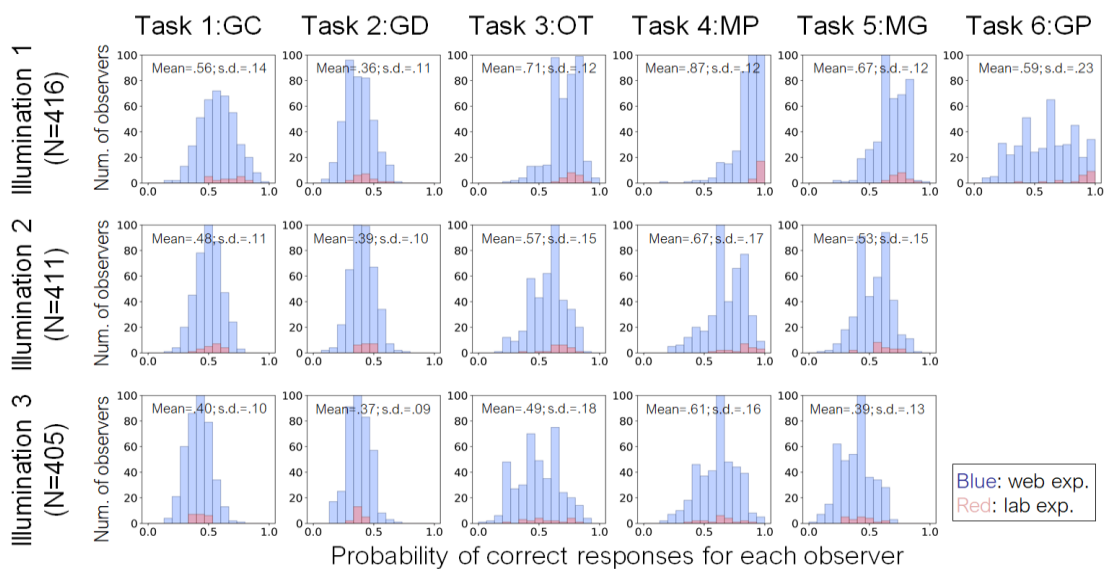

653

654 Figure 15. Histogram of response accuracy for each observer in the crowdsourcing (blue)  
655 and lab (red) experiments. Different panels indicate different material tasks and illumination  
656 conditions. For each condition, the probability of a correct response was calculated by  
657 averaging the responses of each observer across objects and task difficulties. The  
658 histograms of crowdsourcing and lab experiments are overlaid in each panel. The mean  
659 and standard deviation of each distribution are shown in each panel.

660

## 661 **Discussion**

662 The present study aimed to construct a database of material images annotated with the results of  
663 human discrimination tasks. We created material images that varied in six different material  
664 dimensions on the basis of the previous material-recognition studies. Our dataset includes various  
665 objects and illuminations so that users can comprehensively investigate the effects of these physical  
666 causes on material recognition. The results of psychophysical experiments showed that the task  
667 difficulty could be appropriately controlled by manipulating the material parameters. Furthermore,  
668 analysis of visual feature showed that the parameters of higher-order color texture statistics (Fig. 14,  
669 PS color statistics) can partially, but not completely, explain task performance. One crucial point of  
670 our dataset is that we used a non-verbal procedure to collect the observers' data. Since this procedure  
671 is widely used in babies, brain-injured participants, and animals, the current behavioral data can be  
672 a benchmark for more diverse research fields.

673 Since we comprehensively investigated the material recognition using a structured dataset, our  
674 dataset itself revealed novel findings about material recognition. For instance, the present results  
675 showed that the performance of the tasks in the crowdsourcing experiment was strongly correlated  
676 with that in the laboratory experiment. This suggests that the dataset has enough tolerance to conduct  
677 new experiments involving a variety of observers and experimental conditions. Another is that  
678 geometry dependency on material recognition emerges similarly in different material attributes such  
679 as gloss distinctness-of-image or translucency (Fig. 10). Specifically, the translucency  
680 discrimination sensitivity was high when the object had rugged surfaces (e.g., Object 1, 4, & 5).  
681 Some studies have shown that physically prominent features of translucent objects appear around  
682 sharp corners on the surface (Fleming et al., 2005; Gkioulekas et al., 2013). One possibility is that  
683 the diagnostic features for translucent perception lie in the edge/corner of a translucent object and  
684 our rugged objects included much information to judge translucency. More recently, Xiao et al.  
685 (2019) investigated the effect of geometry on translucency perception. In their experiments, they  
686 changed the smoothness of the object edges. In agreement with our findings, the edge modulation  
687 was critical to the translucency perception. Specifically, the object with the smooth edge was  
688 perceived as more translucent than the sharp one.

689 Another finding is that the ability to discriminate the spatial consistency of specular highlights  
690 in glossiness perception has large individual differences, although other glossiness discrimination

691 tasks do not show such large differences. Some studies suggest that image statistics are diagnostic  
692 for glossiness perception (Adelson, 2001; Motoyoshi et al., 2008). However, when specular  
693 highlights of an object image are inconsistent in terms of their position and/or orientation with  
694 respect to the diffuse shading component, they look more like white blobs produced by surface  
695 reflectance changes (Beck & Prazdny, 1981; Kim et al., 2011; Marlow et al., 2011). This is why the  
696 highlight-inconsistency effect is considered to be a counterexample to the image statistics  
697 explanation. The large individual differences suggest that the discrimination of the spatial  
698 consistency of specular highlights may be mediated by a different, and possibly more complicated,  
699 mechanism than that responsible for the glossiness contrast/distinctness-of-image discrimination. In  
700 agreement with this notion, Sawayama and Nishida (2018) showed that highlight inconsistency is  
701 discriminated by different image gradient features from those used in the human material  
702 computation. This suggests that the glossiness computation is mediated by multiple stages, i.e., one  
703 is to discriminate different materials on a surface for extracting a region-of-interest (ROI), and  
704 another is to compute the degree of glossiness in the ROI as shown in Motoyoshi et al. (2007).

705 One may have a concern that the intermediate objects in tasks 4 and 5 are physically infeasible  
706 because they are a mixture of two physically distinct materials. However, our stimuli do not look so  
707 unrealistic. The dielectric/metal materials are distinct material categories when considering an object  
708 with a uniform single material, but many daily objects surrounding us however are a mixture of  
709 various materials, and we often see a plastic object coated by a metallic material. We can regard our  
710 intermediate materials as an approximation of such coated materials. In addition, continuously  
711 connecting distinct categories is common in various research fields such as speech recognition (e.g.,  
712 Grey & Gordon, 1978) or face recognition (e.g., Turk et al., 2002), especially to elucidate what  
713 stimulus image features are involved in the processing. Considering the literature, we think our  
714 intermediate approach is reasonable.

715 Although our database includes diverse material dimensions, they are still not enough to cover  
716 the full range of natural materials. One example is cloth (Xiao et al., 2016; Bi & Xiao, 2016; Bi et  
717 al., 2018; 2019). Cloth material is ubiquitous in everyday environments. A reason we did not include  
718 this class of materials is that it has been shown that the cloth perception strongly relies on dynamic  
719 information (Bi et al., 2018; 2019). Because of the limited experimental time, our database currently  
720 focuses on static images. This is why other materials related to dynamic information (reviewed by  
721 Nishida et al., 2018) related to the perception of liquidness (Kawabe et al., 2015), viscosity (Kawabe  
722 et al., 2015, van Assen & Fleming, 2018), stiffness (Paulun et al., 2017), etc., were not used in the  
723 current investigation. In addition, the perception of wetness (Sawayama, Adelson, & Nishida, 2017)  
724 and the fineness of surface microstructures (Sawayama, Nishida, & Shinya, 2017) were not  
725 investigated because of the difficulty of continuously controlling physical material parameters by  
726 using identical geometries of other tasks. Since we only used five geometries, material perceptions  
727 derived from object mechanical properties were not investigated either (Schmidt et al., 2017). A  
728 crucial point is that we share our source code to reproduce images. We hope to remove obstacles to  
729 constructing a new dataset and contribute to future work on material recognition. Sharing the

730 datasets with the source code should make researchers easily conduct a new experiment in this  
731 literature. For instance, we measured the discrimination sensitivities in our experiments from one  
732 side of the materials in tasks 3, 4, and 5 (i.e., opaque, gold, and silver). The sensitivities from the  
733 other side (i.e., transparent, plastic, and glass) could be slightly different from the current results.  
734 Researchers can easily render new images of different material parameters in the same scene  
735 condition and conduct a new investigation.

736 Our datasets also highlighted the difficulty of choosing appropriate parameters that cover the  
737 full range of the material sensitivity. We chose the stimulus parameters based on the preliminary  
738 experiments. We tried to choose the parameters so that we can measure the sensitivity of each task  
739 in the full range, i.e., from the chance level to the maximum accuracy. However, we found large  
740 individual differences in some tasks, e.g., task 6, and they resulted in the partial measurement of the  
741 narrow sensitivity range. This unpredictability is one of the difficulties of producing the large size  
742 of the dataset. The current findings should contribute to the future attempt making material image  
743 datasets.

744 Our dataset focuses on expanding the previous findings as to material recognition into more  
745 diverse research fields. From the view of a global standard dataset, our dataset has several limitations  
746 as described above. However, it did contribute to this expansion purpose. Specifically, several  
747 research groups of behavioral science, computer science, and neuroscience have on-going projects  
748 utilizing our dataset, and some findings have already been reported at conferences and journals.  
749 Kawasaki et al. (2019) used our dataset to explore the role of the monkey ITC on material perception  
750 by using the electrocorticography (ECoG) recordings. Tsuda et al. (2020) investigated the role of  
751 working memory on material processing using our dataset. Koumura et al. (2018) explored how  
752 mid-level features in deep convolutional neural networks can explain human behavioral data. Imura  
753 et al. (2017) compared the discrimination performance of children and adults. The attention and  
754 memory roles in material recognition are also investigated by Takakura et al. (2017).

755

756

## 757 **Conclusion**

758 We constructed image and observer database for material recognition experiments. We collected  
759 observation data about material discrimination in tasks that had a non-verbal procedure for six  
760 material dimensions and several task difficulties. The results of psychophysical experiments in  
761 laboratory and crowdsourcing environments showed that the performance of the tasks in the  
762 crowdsourcing experiment was strongly correlated with the performance of the tasks in the  
763 laboratory experiment. In addition, by using the above comprehensive data, we showed novel  
764 findings on the perception of translucence and glossiness. Not only can the database be used as  
765 benchmark data for neuroscience and psychophysics studies on the material recognition capability  
766 of healthy adult humans; it can also be used in cross-cultural, cross-species, brain-dysfunction, and  
767 developmental studies of humans and animals.

768

769

## 770 **Acknowledgements**

771 This work was supported by a Grant-in-Aid for Scientific Research on Innovative Areas from  
772 the Japan Society of Promotion of Science to SN and YD (JSPS KAKENHI Grant Numbers  
773 JP15H05915, JP15H05924, 20H05957).

774 Commercial relationships: none.

775

## 776 **Competing interests**

777 The authors declare no competing financial interests.

778

## 779 **References**

780

781 Adelson, E. H. in *Photonics West 2001-Electronic Imaging*. 1-12 (International Society for Optics  
782 and Photonics).

783 Adams, W. J., Kerrigan, I. S. & Graf, E. W. (2016) Touch influences perceived gloss. *Scientific*  
784 *reports* **6**, 21866.

785 Ashikmin, M., Premože, S. & Shirley, P. in *Proceedings of the 27th annual conference on Computer*  
786 *graphics and interactive techniques*. 65-74 (ACM Press/Addison-Wesley Publishing Co.).

787 Beck J., & Prazdny S. (1981). Highlights and the perception of glossiness. *Perception, &*  
788 *Psychophysics*, 30(4), 407–410.

789 Bi, W, and Xiao, B. (2016). Perceptual constancy of mechanical properties of fabrics under  
790 variation of external force. *Proceedings of the ACM Symposium on Applied Perception*  
791 (pp. 19–23). New York, NY: ACM.

- 792 Bi, W., Jin, P., Nienborg, H., & Xiao, B. (2018). Estimating mechanical properties of cloth from  
793 videos using dense motion trajectories: Human psychophysics and machine learning.  
794 *Journal of Vision*, 18(5):12, 1–20,
- 795 Bi, W., Jin, P., Nienborg, H., & Xiao, B. (2019). Manipulating patterns of dynamic deformation  
796 elicits the impression of cloth with varying stiffness. *Journal of Vision*, 19(5):18, 1–18
- 797 Brainard, D. H. & Hurlbert, A. C. Colour vision: understanding #thedress. *Current Biology* **25**,  
798 R551-R554 (2015).
- 799 Chadwick, A.C., Cox, G., Smithson, H.E., Kentridge, R.W. Beyond scattering and absorption:  
800 perceptual unmixing of translucent liquids. *Journal of Vision*. 18(11):18, 1–15 (2018)
- 801 Craven, B. J. (1992). A table of  $d'$  for M-alternative odd-man-out forced-choice  
802 procedures. *Perception & Psychophysics*, 51(4), 379-385.
- 803 Doerschner, K. *et al.* Visual motion and the perception of surface material. *Current Biology* **21**,  
804 2010-2016, doi:10.1016/j.cub.2011.10.036 (2011).
- 805 Fleming, R. W. (2017). Material perception. *Annual review of vision science*, 3, 365-388.
- 806 Fleming, R. W. & Bühlhoff, H. H. Low-level image cues in the perception of translucent materials.  
807 *ACM Transactions on Applied Perception (TAP)* **2**, 346-382 (2005).
- 808 Fleming, R. W., Dror, R. O. & Adelson, E. H. Real-world illumination and the perception of surface  
809 reflectance properties. *Journal of vision* **3**, 3-3 (2003).
- 810 Gegenfurtner, K. R., Bloj, M., & Toscani, M. (2015). The many colours of ‘the dress’. *Current*  
811 *Biology*, 25(13), R543-R544.
- 812 Gkioulekas, I., Xiao, B., Zhao, S., Adelson, E.H., Zickler, T., Bala, K. (2013) Understanding the  
813 role of phase function in translucent appearance. *ACM Transactions on Graphics* **32**, 1-19,  
814 doi:10.1145/2516971.2516972.
- 815 Gkioulekas, I., Walter, B., Adelson, E.H., Bala, K., Zickler, T. (2015) On the appearance of  
816 translucent edges, *In Proceedings of the IEEE Conference on Computer Vision and Pattern*  
817 *Recognition (CVPR) 2015*, pp. 5528–5536.
- 818 Goda, N., Yokoi, I., Tachibana, A., Minamimoto, T. & Komatsu, H. (2016) Crossmodal association  
819 of visual and haptic material properties of objects in the monkey ventral visual cortex.  
820 *Current Biology* **26**, 928-934.
- 821 Grey, J. M., & Gordon, J. W. (1978). Perceptual effects of spectral modifications on musical timbres.  
822 *The Journal of the Acoustical Society of America*, 63(5), 1493-1500.
- 823 Hunter, R. S. (1937). Methods of determining gloss. NBS Research paper RP, 958.
- 824 Imura, T., Sawayama, M., Shirai, T., Tomonaga, M., & Nishida, S. (2017) ヒト児童における  
825 光沢質感の知覚. 日本基礎心理学会第 36 回大会, 大阪, 日本
- 826 Jakob, W. Mitsuba physically based renderer. mitsuba-renderer. Org. (2010).



- 827 Jensen, H. W., Marschner, S. R., Levoy, M. & Hanrahan, P. (2001) A practical model for subsurface  
828 light transport. *In Proceedings of the 28th annual conference on Computer graphics and*  
829 *interactive techniques*, 511-518.
- 830 Kawabe, T., Maruya, K. & Nishida, S. (2015) Perceptual transparency from image deformation.  
831 *Proceedings of the National Academy of Sciences* **112**, E4620-E4627
- 832 Kawabe, T., Maruya, K., Fleming, R. W. & Nishida, S. (2015) Seeing liquids from visual motion.  
833 *Vision Research* **109**, 125-138, doi:10.1016/j.visres.2014.07.003.
- 834 Kawasaki, K., Miki, H., Anzai, K., Sawayama, M., Matsuo, T., Suzuki, T., Hasegawa, T., & Okatani,  
835 T. (2019) Spatial and time-frequency representations of glossy material properties in the  
836 monkey inferior temporal cortex. Society for Neuroscience 2019, Chicago, IL
- 837 Kentridge, R. W., Thomson, R. & Heywood, C. A. (2012) Glossiness perception can be mediated  
838 independently of cortical processing of colour or texture. *Cortex* **48**, 1244-1246,  
839 doi:10.1016/j.cortex.2012.01.011.
- 840 Kim, J., & Marlow, P. J. (2016). Turning the world upside down to understand perceived  
841 transparency. *i-Perception*, 7(5), 2041669516671566.
- 842 Kim, J., Marlow, P. & Anderson, B. L. (2011) The perception of gloss depends on highlight  
843 congruence with surface shading. *Journal of Vision* **11**, doi:10.1167/11.9.4.
- 844 Kingdom, F. A .A. & Prins, N. (2010) Psychophysics: A Practical Introduction. Academic Press: an  
845 imprint of Elsevier, London.
- 846 Kingdom, F. A .A. & Prins, N. (2016) Psychophysics: A Practical Introduction, Second Edition.  
847 Academic Press: an imprint of Elsevier, London.
- 848 Koumura, T., Sawayama, M., & Nishida, S., (2018), "Explaining behavioral data of visual material  
849 discrimination with a neural network for natural image recognition", 28th Annual  
850 Conference of Japanese Neural Network Society, Okinawa, Japan
- 851 Macmillan, N. A., & Kaplan, H. L. (1985). Detection theory analysis of group data: estimating  
852 sensitivity from average hit and false-alarm rates. *Psychological bulletin*, 98(1), 185.
- 853 Marlow, P., Kim, J. & Anderson, B. L. (2011) The role of brightness and orientation congruence in  
854 the perception of surface gloss. *Journal of Vision* **11**, doi:10.1167/11.9.16.
- 855 Marlow, P. J., Kim, J. & Anderson, B. L. (2012) The perception and misperception of specular  
856 surface reflectance. *Current Biology* **22**, 1909-1913, doi:10.1016/j.cub.2012.08.009.
- 857 Miyakawa N., Banno T., Abe H., Tani T., Suzuki W., & Ichinohe N. (2017). Representation of  
858 glossy material surface in ventral superior temporal sulcal area of common marmosets.  
859 *Frontiers in Neural Circuits*, 11, 17, 1–15.
- 860 Motoyoshi, I. (2010) Highlight-shading relationship as a cue for the perception of translucent and  
861 transparent materials. *Journal of Vision* **10**, 6, doi:10.1167/10.9.6.
- 862 Motoyoshi, I., & Matoba, H. (2012). Variability in constancy of the perceived surface  
863 reflectance across different illumination statistics. *Vision Research*, 53(1), 30-39.



- 864 Motoyoshi I., Nishida S., Sharan L., & Adelson E. H. (2007). Image statistics and the perception of  
865 surface qualities. *Nature*, 447(7141), 206–209. pmid:17443193
- 866 Nagai, T. *et al.* Image regions contributing to perceptual translucency: A psychophysical reverse-  
867 correlation study. *i-Perception* **4**, 407-428 (2013).
- 868 Nishida, S. Y. (2019). Image statistics for material perception. *Current Opinion in Behavioral*  
869 *Sciences*, 30, 94-99.
- 870 Nishida, S. Y., Kawabe, T., Sawayama, M., & Fukiage, T. (2018). Motion perception: From  
871 detection to interpretation. *Annual review of vision science*, 4, 501-523.
- 872 Nishida, S. & Shinya, M. Use of image-based information in judgments of surface-reflectance  
873 properties. *Journal of the Optical Society of America A* **15**, 2951-2965 (1998).
- 874 Nishio, A., Goda, N., & Komatsu, H. (2012). Neural selectivity and representation of gloss in the  
875 monkey inferior temporal cortex. *Journal of Neuroscience*, 32(31), 10780-10793.
- 876 Nishio, A., Shimokawa, T., Goda, N. & Komatsu, H. Perceptual gloss parameters are encoded by  
877 population responses in the monkey inferior temporal cortex. *Journal of Neuroscience* **34**,  
878 11143-11151, doi:10.1523/JNEUROSCI.1451-14.2014 (2014).
- 879 Okazawa, G., Koida, K. & Komatsu, H. Categorical properties of the color term “GOLD”. *Journal*  
880 *of Vision* **11**, 4-4, doi:10.1167/11.8.4 (2011).
- 881 Olkkonen, M. & Brainard, D. H. Perceived glossiness and lightness under real-world illumination.  
882 *Journal of Vision* **10**, 5-5, doi:10.1167/10.9.5 (2010).
- 883 Pellacini, F., Ferwerda, J. A., & Greenberg, D. P. (2000, July). Toward a psychophysically-based  
884 light reflection model for image synthesis. In *Proceedings of the 27th annual conference*  
885 *on Computer graphics and interactive techniques* (pp. 55-64). ACM Press/Addison-Wesley  
886 Publishing Co.
- 887 Prins, N & Kingdom, F. A. A. (2018) Applying the model-comparison approach to test specific  
888 research hypotheses in psychophysical research using the Palamedes Toolbox. *Frontiers in*  
889 *Psychology*, 9:1250. doi: 10.3389/fpsyg.2018.01250
- 890 Saarela, T., & Olkkonen, M. (2016) ShapeToolbox, <https://github.com/saarela/ShapeToolbox>
- 891 Saarela, T. (2018) ShapeToolbox: Creating 3D models for vision research. *Journal of Vision*  
892 18(10):229. doi: 10.1167/18.10.229.
- 893 Sawayama, M., Adelson, E. H., & Nishida, S. (2017). Visual wetness perception based on image  
894 color statistics. *Journal of Vision*, 17(5):7, 1–24, doi:10.1167/17.5.7.
- 895 Sawayama, M., & Nishida, S. Y. (2018). Material and shape perception based on two types of  
896 intensity gradient information. *PLoS computational biology*, 14(4), e1006061.
- 897 Sawayama, M., Nishida, S., & Shinya, M. (2017). Human perception of subresolution fineness of  
898 dense textures based on image intensity statistics. *Journal of Vision*, 17(4):8, 1–18,  
899 doi:10.1167/17.4.8.
- 900 Schmidt, F., Paulun, V. C., van Assen, J. J. R., & Fleming, R. W. (2017). Inferring the stiffness  
901 of unfamiliar objects from optical, shape, and motion cues. *Journal of Vision*, 17(3):18,  
902 1–17, doi:10.1167/17.3.18.

- 903 Sun, H.-C., Ban, H., Di Luca, M. & Welchman, A. E. fMRI evidence for areas that process surface  
904 gloss in the human visual cortex. *Vision research* **109**, 149-157 (2015).
- 905 Takakura, K., Tseng, C., Matsumiya, K., Kuriki, I., & Shioiri, S. (2018) 質感と初期視覚特徴  
906 の間の時間周波数特性の違いに関する検討. 日本視覚学会 2018 年夏季大会. 茨  
907 城, 日本
- 908 Tamura, H., Prokott, K. E., & Fleming, R. W. (2019). Distinguishing mirror from glass: A 'big data'  
909 approach to material perception. arXiv preprint arXiv:1903.01671.
- 910 Tsuda, H., Fujimichi, M., Yokoyama, M., & Saiki, J. (2020). Material constancy in perception  
911 and working memory. *Journal of Vision*, 20(10):10, 1–16
- 912 Turk, D. J., Heatherton, T. F., Kelley, W. M., Funnell, M. G., Gazzaniga, M. S., & Macrae, C. N.  
913 (2002). Mike or me? Self-recognition in a split-brain patient. *Nature neuroscience*, 5(9),  
914 841-842.
- 915 van Assen, J. J. R., Barla, P., & Fleming, R. W. (2018). Visual features in the perception of liquids.  
916 *Current biology*, 28(3), 452-458.
- 917 Vangorp, P., Laurijssen, J., & Dutré, P. (2007, August). The influence of shape on the perception of  
918 material reflectance. *ACM Transactions on graphics (TOG)*, 26(3), 267-276.
- 919 Walter, B., Marschner, S. R., Li, H. & Torrance, K. E. (2007) Microfacet models for refraction  
920 through rough surfaces. *In Proceedings of the 18th Eurographics conference on Rendering*  
921 *Techniques*, 195-206.
- 922 Ward, G. J. Measuring and modeling anisotropic reflection. *ACM SIGGRAPH Computer Graphics*  
923 **26**, 265-272 (1992).
- 924 Xiao, B., Walter, B., Gkioulekas, I., Zickler, T., Adelson, E., & Bala, K. (2014). Looking against  
925 the light: how perception of translucency depends on lighting direction. *Journal of Vision*,  
926 14(3):17, 1–22, doi:10.1167/14.3.17.
- 927 Xiao, B., Bi, W., Jia, X., Wei, H., & Adelson, E. H. (2016). Can you see what you feel? Color and  
928 folding properties affect visual–tactile material discrimination of fabrics. *Journal of Vision*,  
929 16(3):34, 1–15, doi:10.1167/16.3.34.
- 930 Xiao, B., Zhao, S., Gkioulekas, I., Bi, W., & Bala, K., Effect of geometric sharpness on  
931 translucent material perception. bioRxiv, doi: <https://doi.org/10.1101/795294>
- 932 Yang, J., Kanazawa, S., Yamaguchi, M. K. & Motoyoshi, I. Pre-constancy vision in infants. *Current*  
933 *Biology* **25**, 3209-3212 (2015).
- 934 Zhang, F., de Ridder, H., Barla, P., & Pont, S. (2019). A systematic approach to testing and  
935 predicting light-material interactions. *Journal of Vision*, 19(4):11, 1–22,  
936 <https://doi.org/10.1167/19.4.11>.

937

938

939 **Appendix A**

940 The results of the crowdsourcing experiment are shown in Figures A1 to A6. The same  
 941 experiments were also conducted in the laboratory environment, and their results are shown in  
 942 Figures 8 to 13.  
 943  
 944

## Task 1: GC

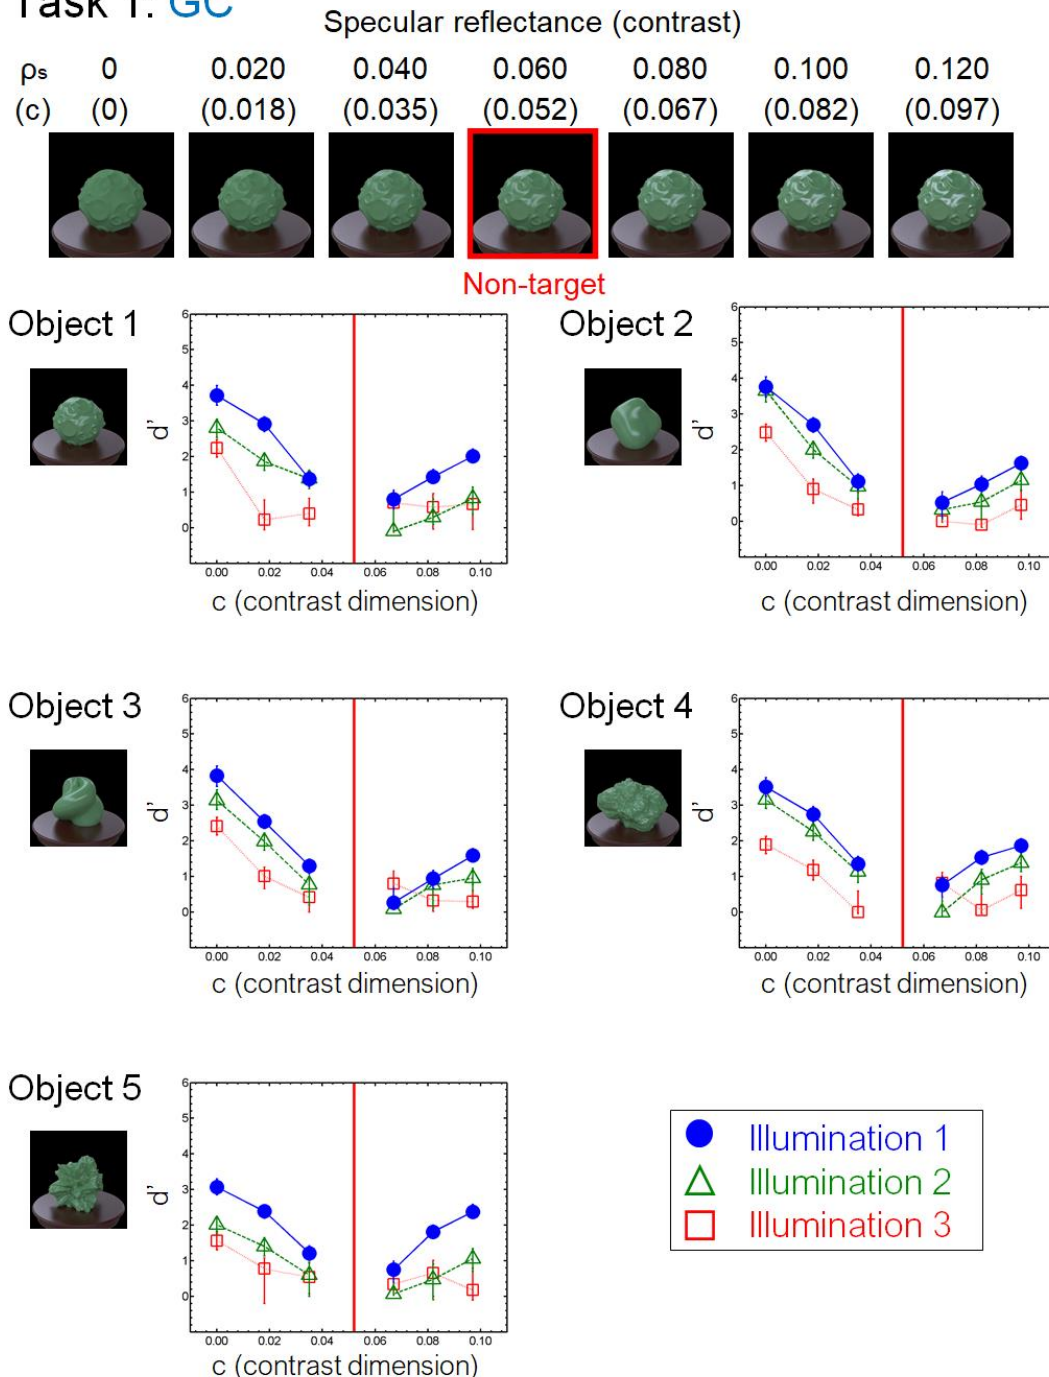

945  
 946 Figure A1. Results of task 1 (GC) in the crowdsourcing experiment. Different panels show different  
 947 objects. Different symbols in each panel depict different illumination conditions. The vertical red  
 948 line in each panel indicates the parameter of the non-target stimulus. Error bars indicate the 95%  
 949 bootstrap confidence intervals.

## Task 2: GD

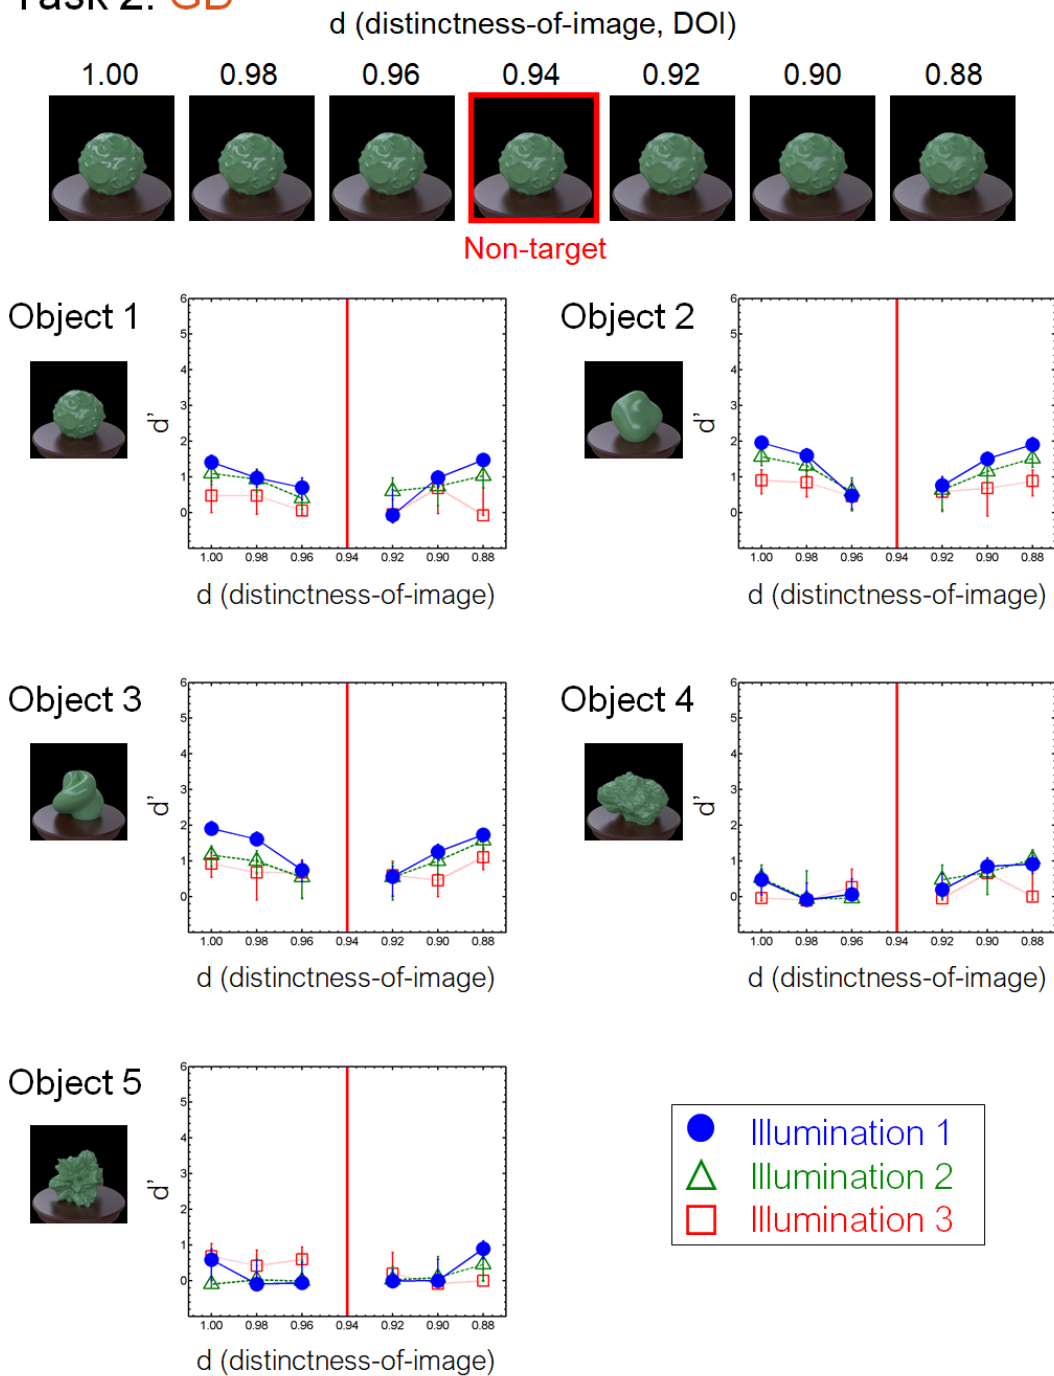

950

951 Figure A2. Results of task 2 (GD) in the crowdsourcing experiment.

### Task 3: OT

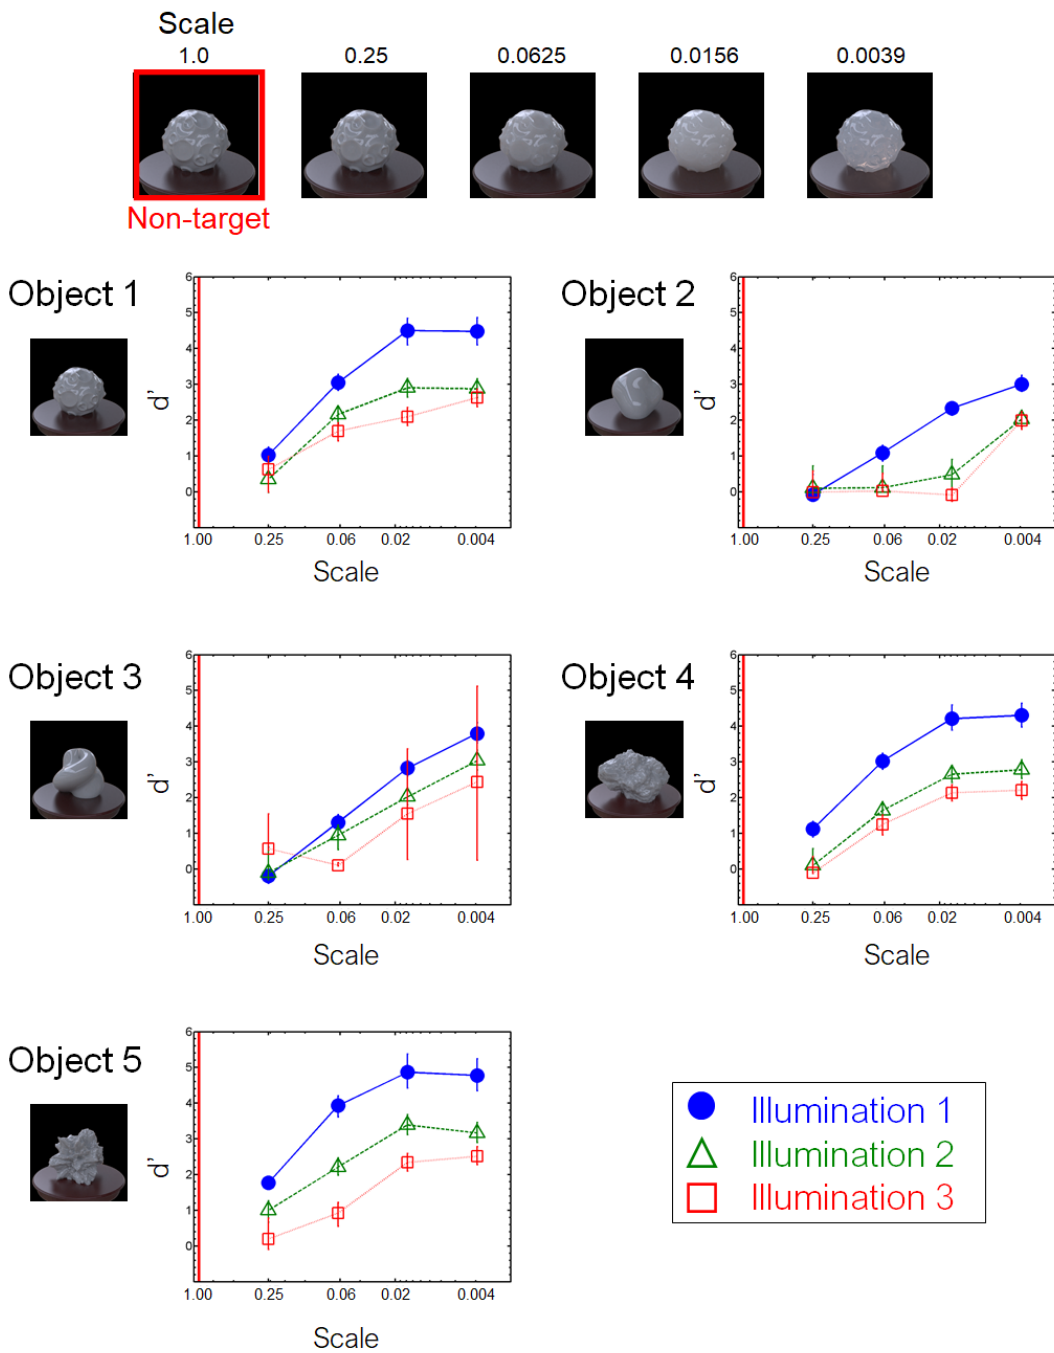

952

953 Figure A3. Results of task 3 (OT) in the crowdsourcing experiment.

## Task 4: MP

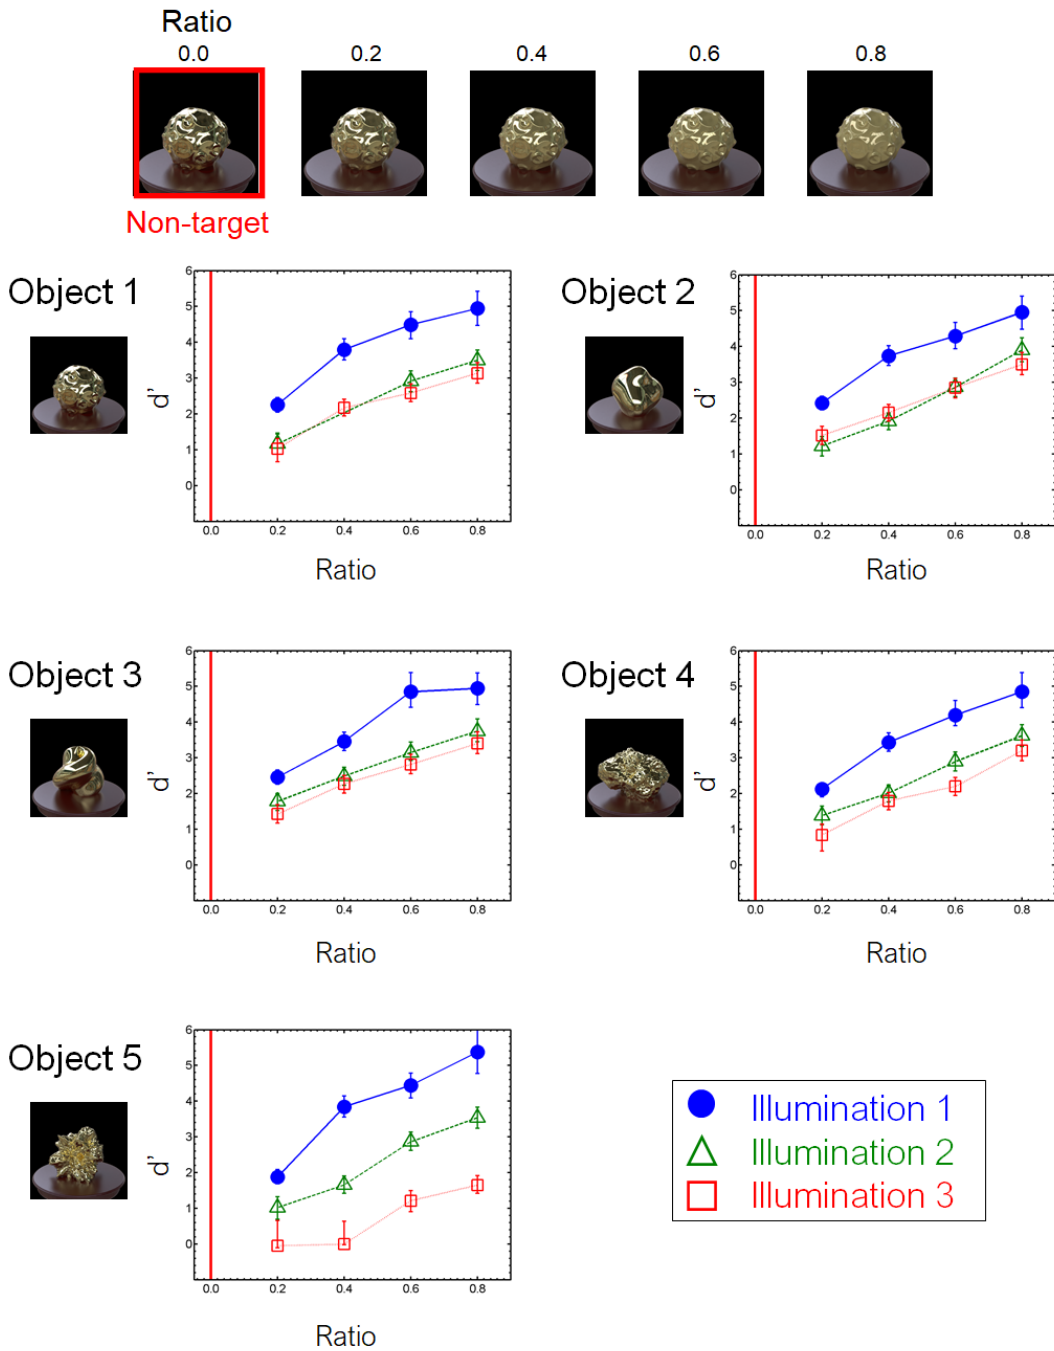

954

955 Figure A4. Results of task 4 (MP) in the crowdsourcing experiment.

## Task 5: MG

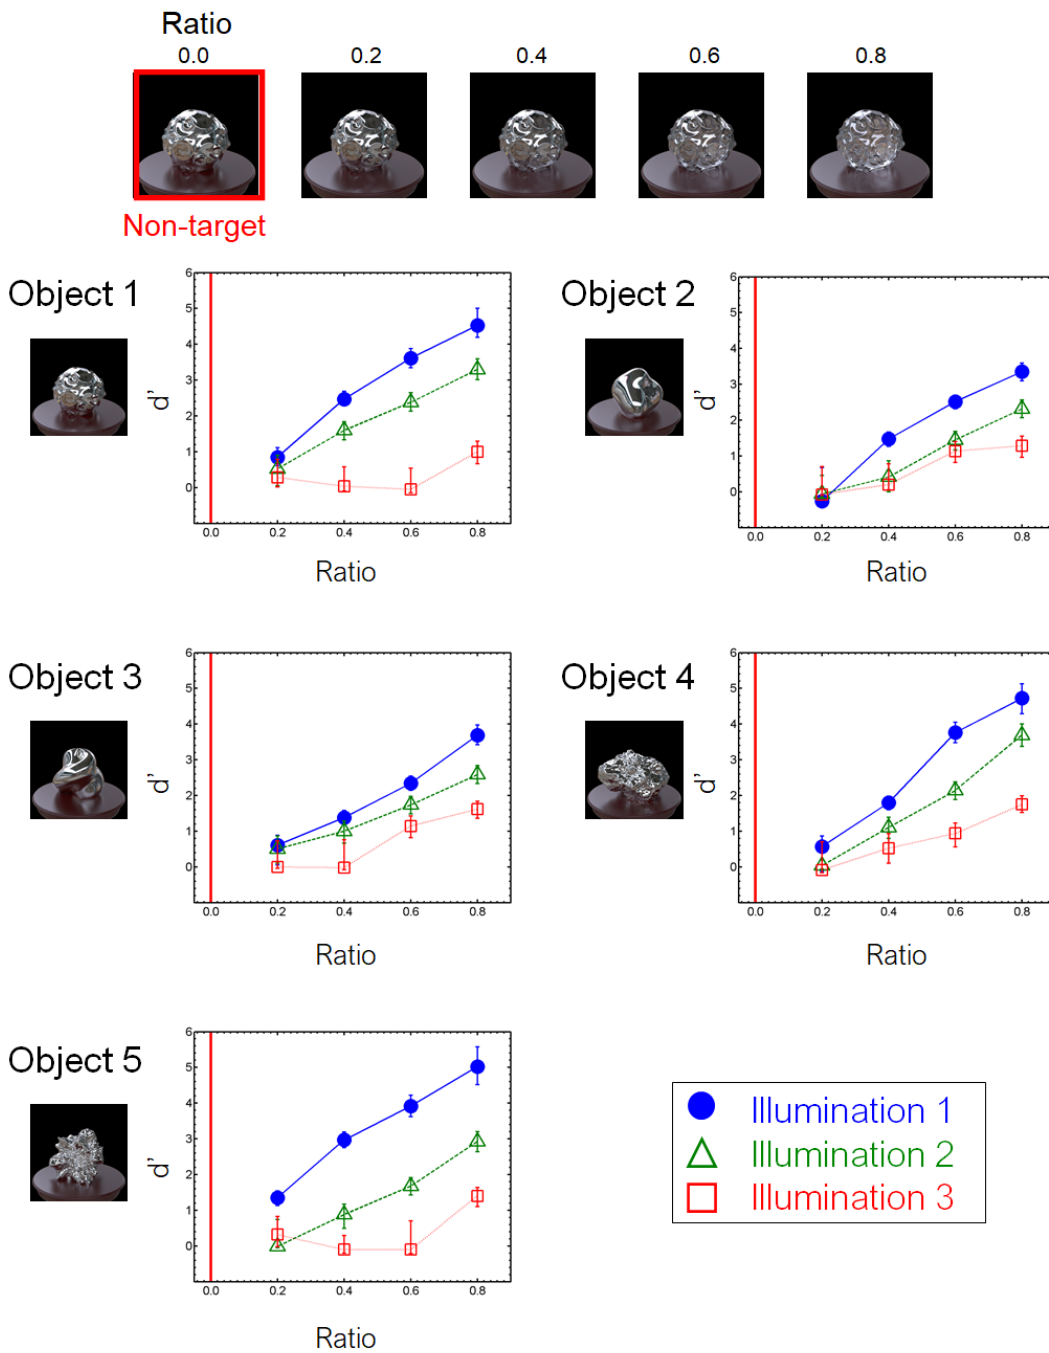

956

957 Figure A5. Results of task 5 (MG) in the crowdsourcing experiment.



## Task 6: GP

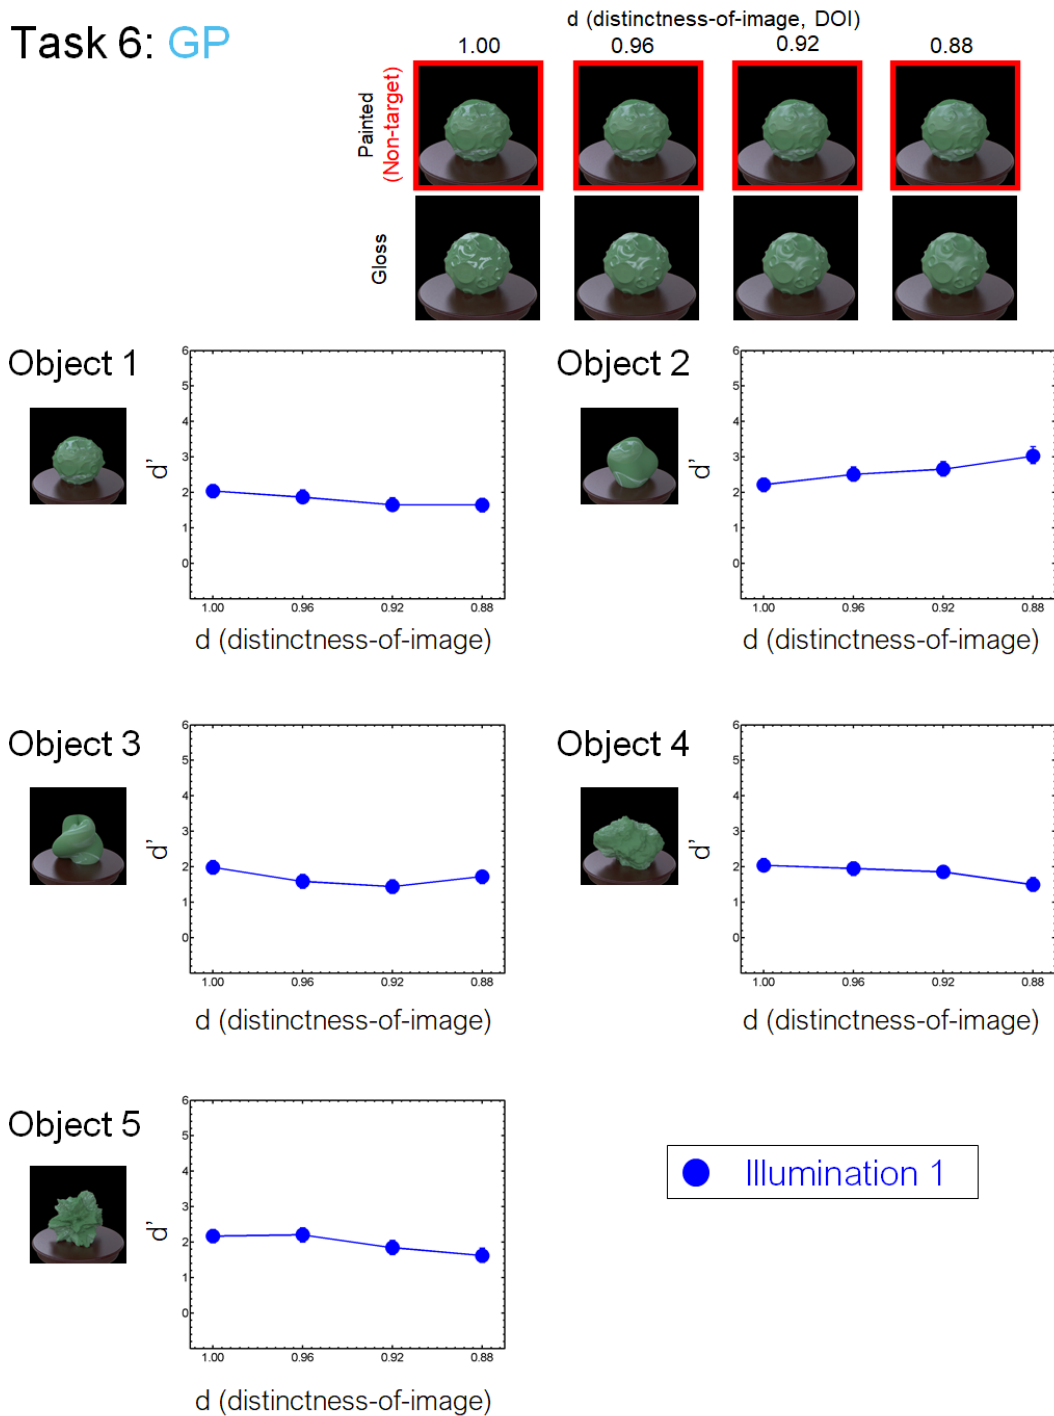

958

959 Figure A6. Results of task 6 (GP) in the crowdsourcing experiment.

960

961

## 962 Appendix B

### 963 Data records

964 The database is available at

965 [https://www.dropbox.com/s/6bh1ncm8mv3i7dx/material\\_swym.zip?dl=0](https://www.dropbox.com/s/6bh1ncm8mv3i7dx/material_swym.zip?dl=0) [Currently, the database

966 is in a Dropbox folder, but we will put it on our project page later]. Figure A1 shows the data  
 967 structure. The standard data are divided into three folders according to the illumination conditions.  
 968 Each illumination condition folder contains folders of the material tasks (Task 1 to 6). Each material  
 969 task folder includes experimental task folders. Each experimental task folder corresponds to one task  
 970 in the behavioural experiments. The name of each folder indicates the illumination condition, object,  
 971 material task, and task level. For instance, the name “Il1\_obj1\_Task1\_06\_12” indicates illumination  
 972 condition 1 (i.e., Il1), object 1 (i.e., obj1), task 1 (Task1), contrast of 0.06 for the non-target stimulus,  
 973 and contrast of 0.12 for the comparison stimulus.

974 Each task folder contains the two folders named “1” and “0”. The images in the folder “0”  
 975 indicate the non-target stimuli, while the images in the folder “1” are the target stimuli. Under  
 976 illumination condition 1, three images are randomly selected from folder “0”, and one correct image  
 977 is selected from folder “1”. Five images with different poses are stored in each “1” or “0” folder for  
 978 illumination condition 1, while three images with different illuminations are stored for illumination  
 979 conditions 2 and 3. The images in the database are in .png format and have a size of 512 x 512 px.  
 980 In addition, standard observer data are placed on the top layer in the database in a .csv file. The file  
 981 includes observer data including the probability of the correct response and the sensitivity  $d'$  for  
 982 each task in the crowdsourcing and laboratory experiments.

983

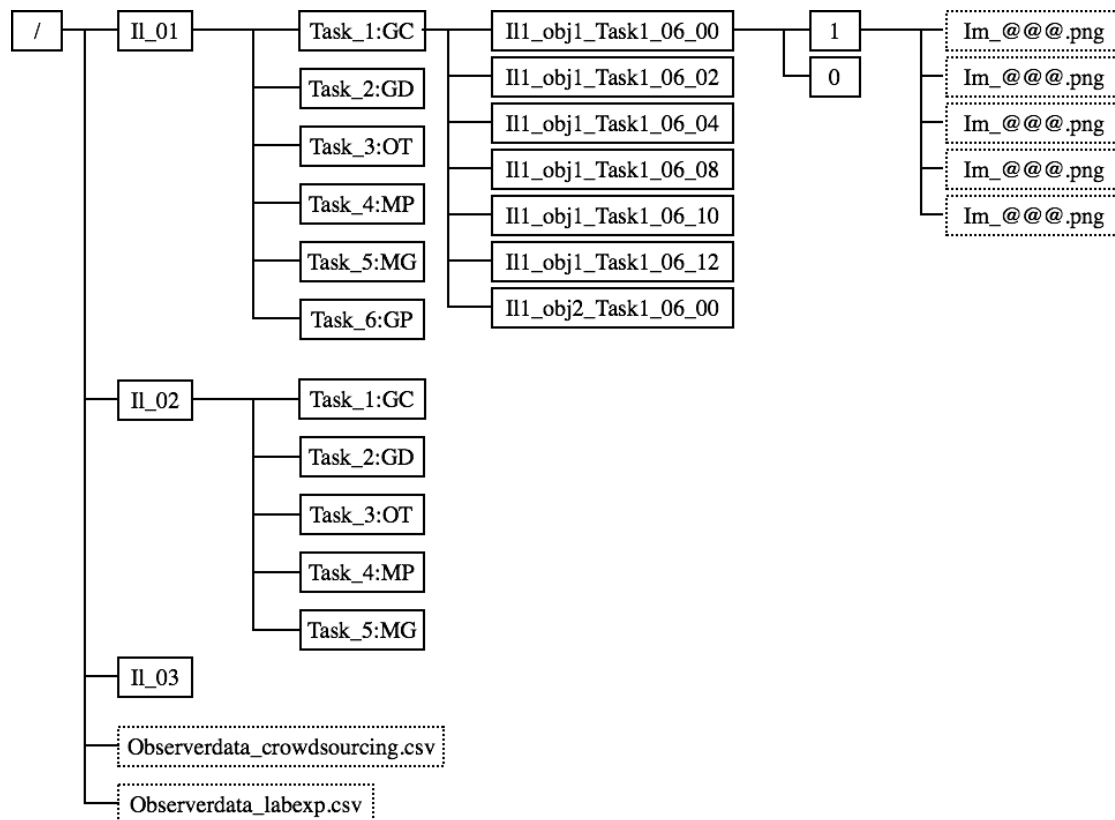

984

985 Figure A1. Data structure in the database. Solid rectangles indicate a folder, while the  
 986 dashed ones indicate a file.

## 987 Appendix C

988 We analyzed how our datasets are represented in convolutional neural networks (CNNs). We  
989 extracted the visual features from each intermediate layer of a CNN. We used the VGGNet16  
990 (Simonyan and Zisserman, 2014), pre-trained for the object recognition task using ImageNet 2012  
991 (Russakovsky et al., 2015), and computed the activation of thirty convolution layers and three fully-  
992 connected-layers of the model. To reduce the number of dimensions, we spatially averaged each  
993 channel's activation. Thus, we obtained the multidimensional activation vector for each layer with  
994 the dimension number of the channels.

995 Figures C1 to C4 show the t-SNE embedding of each layer (Maaten & Hinton, 2008). Figure C1  
996 shows the results of the first convolution layer (conv 1\_1), the last convolution layer (conv 5\_3),  
997 and the third fully-connected-layer. Each plot indicates each material image. Different panels in each  
998 column mean different labelings based on task, object, and illumination, as shown in the legends.  
999 Figure C2 shows the embeddings of all the layers, which are colored by different tasks. Figures C3  
1000 and C4 show the same embeddings as Figure C2, except colored according to different objects and  
1001 illuminations, respectively.

1002 The embedding of the first convolution layer (conv 1\_1) showed the clusters according to task  
1003 differences, especially MG, MP, and OT clusters. In contrast, this embedding didn't show any object-  
1004 based clusters. Earlier layers are generally sensitive to lower image features. Different tasks have  
1005 different colors in our datasets, except that the tasks GC, GD, GP share similar green colors. In  
1006 addition, some clusters of illumination condition 3 emerged in the first layer embedding. The pixel  
1007 color distribution of illumination condition 3 is also largely different from the others. These results  
1008 suggest that the first layer code such lower image features.

1009 The embeddings of the last convolution layer and the third fully-connected layer showed the  
1010 clusters according to object differences. Different tasks and illuminations are separately distributed  
1011 within each object cluster. Although the embedding is clustered according to object differences, it  
1012 didn't show the separation between Objects 2 and 3. This finding is consistent with human  
1013 discrimination performance. The results of behavioral experiments showed that the task accuracies  
1014 of Objects 2 and 3 were similar to each other and different from other object conditions, especially  
1015 on Task GD and OT.

1016

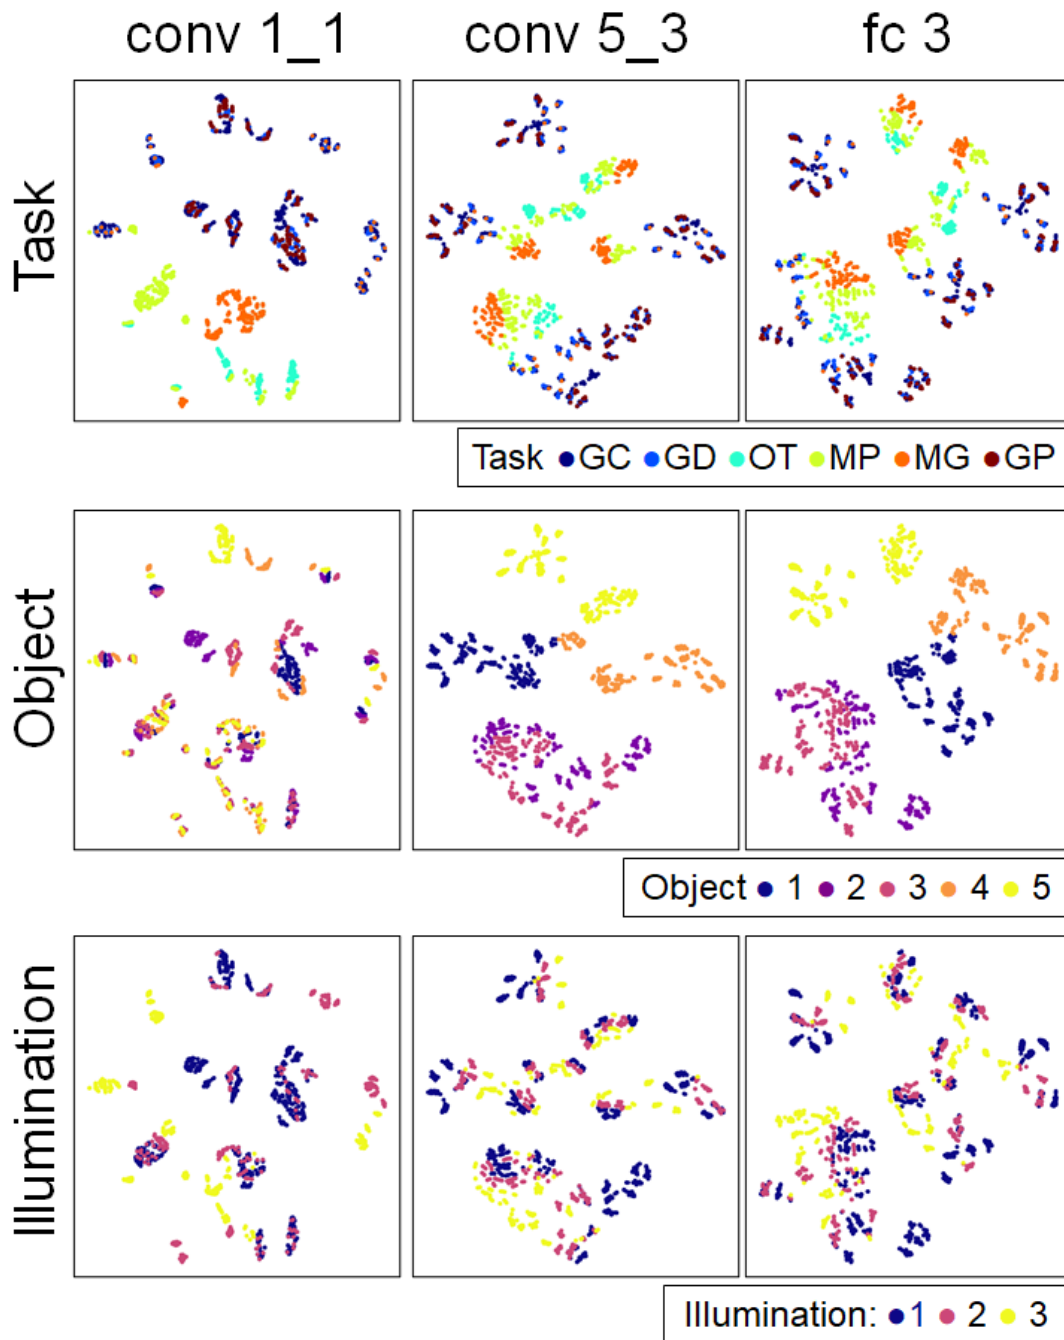

1017

1018 Figure C1. Embedding spaces of intermediate features of a deep neural network trained

1019 for object recognition. The top, center, and bottom rows show the same embedding spaces

1020 with different color symbols as shown in the legend. The left, middle, and right columns are

1021 the results of the first convolution layer (conv1\_1), the final convolution layer (conv5\_3),

1022 and the third fully connected layer (fc 3), respectively.

1023

## Task

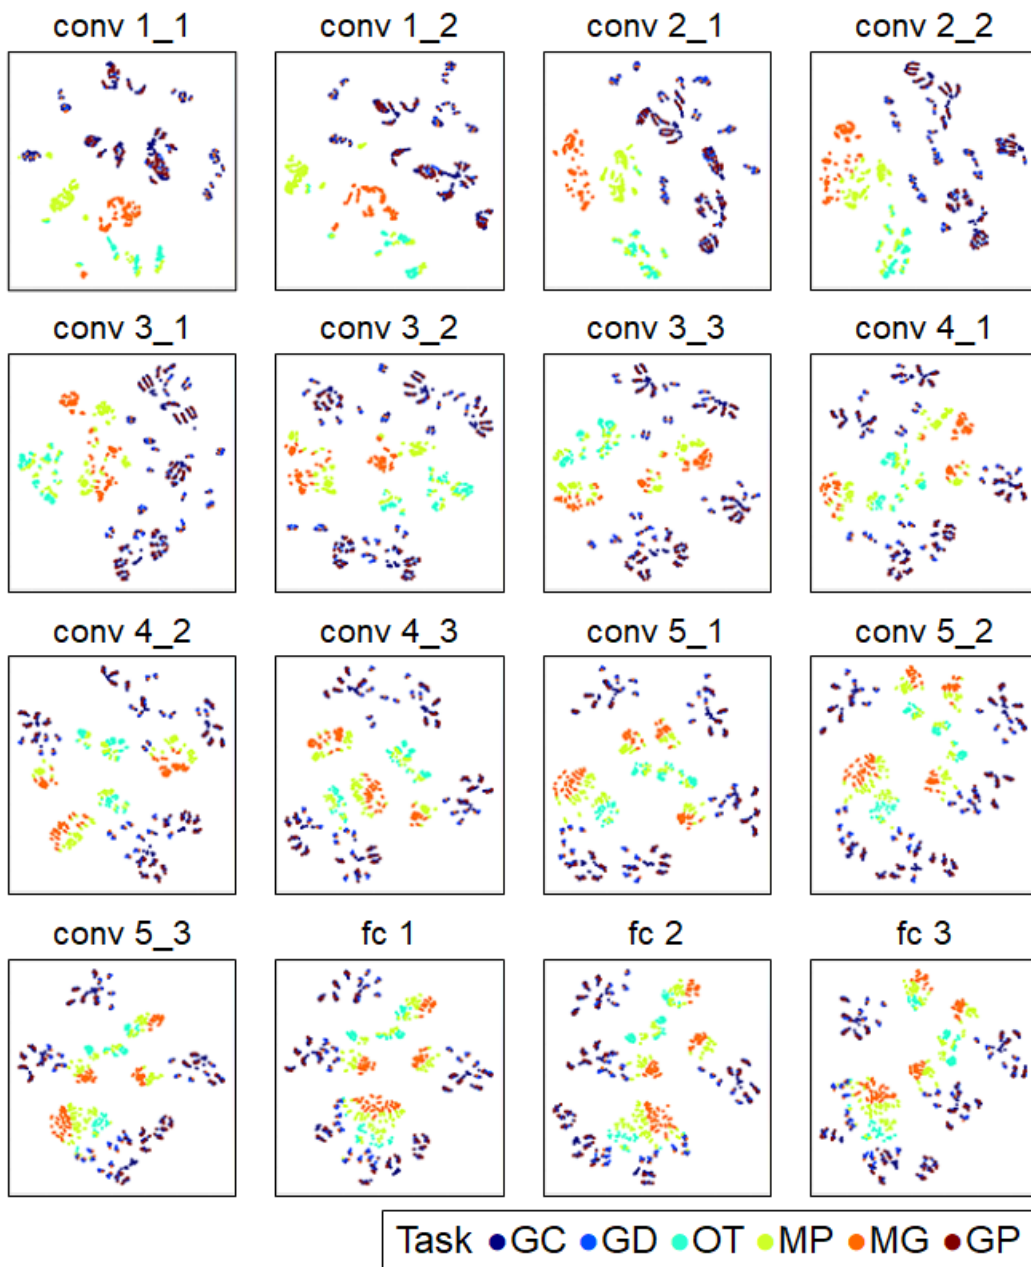

1024

1025 Figure C2. Embedding spaces of intermediate features of a deep neural network trained  
1026 for object recognition. Results of all the 16 layers are shown with coloring different tasks.

## Object

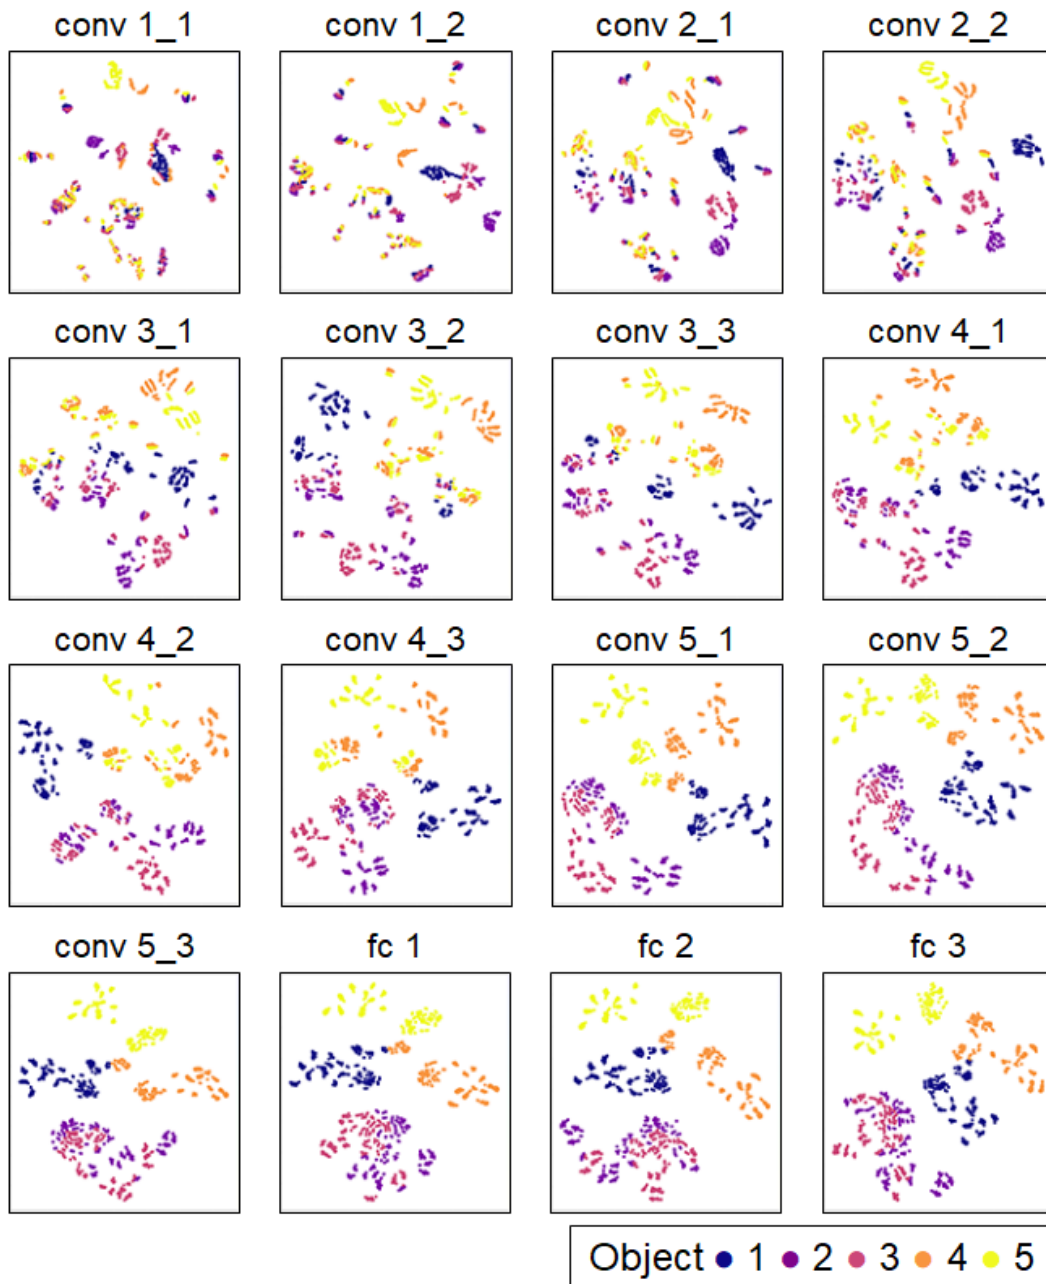

1027

1028 Figure C3. Embedding spaces of intermediate features of a deep neural network trained

1029 for object recognition. Results of all the 16 layers are shown with coloring different objects.

1030

## Illumination

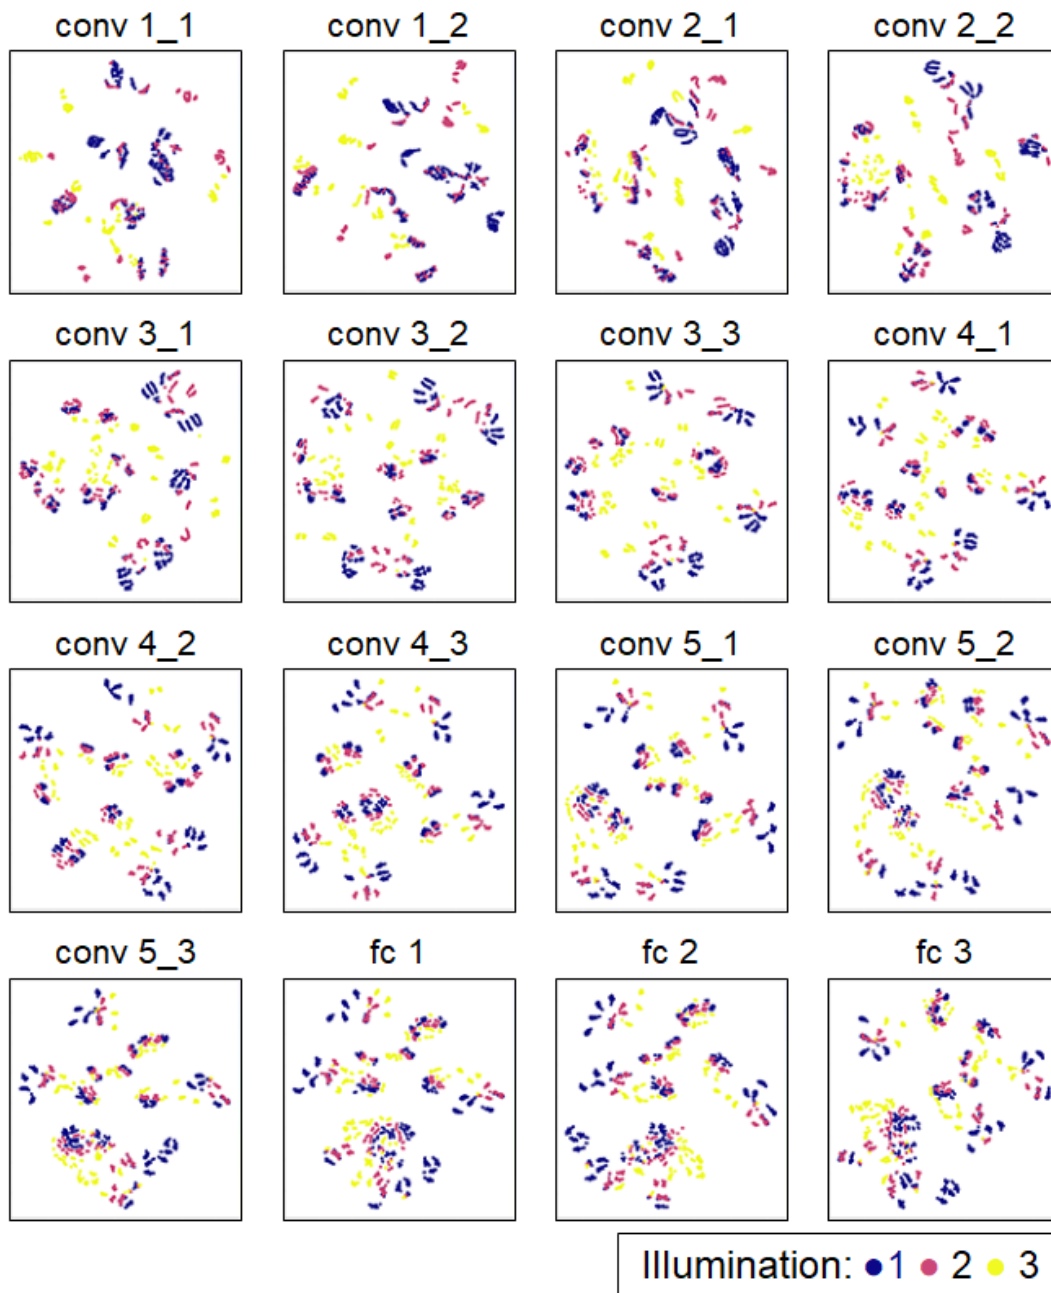

1031

1032 Figure C4. Embedding spaces of intermediate features of a deep neural network trained

1033 for object recognition. Results of all the 16 layers are shown with coloring different objects.

1034

1035

1036
